# Supplementary material for: Serotonin (5-HT) 2A Receptor Involvement in Melanin Synthesis and Transfer via Activating the PKA/CREB Signaling Pathway
Source: MDPI journal article supplement (doi:10.3390/ijms23116111), 2022-05-30

## Supplemental Materials

**Supplemental Table S1. Chemicals used in this research.**

| Chemicals     | Stock concentration | Supplier                  |
|---------------|---------------------|---------------------------|
| 5-HT          | 1 M                 | Sigma                     |
| $\alpha$ -MSH | 50 $\mu$ M          | Sigma                     |
| AT1015        | 100 mM              | APExBIO                   |
| Ketanserin    | 100 mM              | MedChemExpress            |
| DOI           | 100 mM              | Sigma                     |
| TCB-2         | 100 mM              | APExBIO                   |
| PTU           | 20 mM               | Sigma                     |
| H89           | 10 mM               | MedChemExpress            |
| KN93          | 1 mM                | MedChemExpress            |
| PD98059       | 20 mM               | Cell signaling technology |
| Phalloidin    | 200 $\mu$ g/mL      | Sigma                     |

**Supplemental Table S2. The antibody used in this research.**

| Protein                                 | Antibody supplier         | Cat log. |
|-----------------------------------------|---------------------------|----------|
| MITF                                    | Abcam                     | ab20663  |
| TYR                                     | Abcam                     | ab180753 |
| GP100                                   | Abcam                     | ab137078 |
| RAB7                                    | Cell signaling technology | 8013     |
| RAB17                                   | Cell signaling technology | 9367     |
| RAB27                                   | Cell signaling technology | 69295    |
| RAC1                                    | Abcam                     | ab155938 |
| CDC42                                   | Abcam                     | ab187643 |
| CREB                                    | Cell signaling technology | 9197     |
| P-CREB (Ser133)                         | Cell signaling technology | 9198     |
| CAMKII- $\gamma$                        | Abcam                     | ab37999  |
| p-CAMKII- $\gamma$ (T286)               | Abcam                     | ab32678  |
| p38                                     | Cell signaling technology | 8690     |
| P-p38 (Thr180/Tyr182)                   | Cell signaling technology | 4511     |
| ERK1/2                                  | Cell signaling technology | 4695     |
| P-ERK1/2 (Thr202/Tyr204)                | Cell signaling technology | 4370     |
| JNK                                     | Cell signaling technology | 9258     |
| P-JNK (Thr183/Tyr185)                   | Cell signaling technology | 4668     |
| $\beta$ -actin                          | Santa cruz                | sc-69879 |
| Goat Anti-Mouse IgG H&L (HRP)           | Abcam                     | ab6789   |
| Goat Anti-Rat IgG H&L(Alexa Fluor® 405) | Abcam                     | ab175671 |

**Supplemental Table S3. The oligo sequences used in this research.**

| <b>Gene name</b>          | <b>Species</b>      | <b>Forward primer</b>            | <b>Reverse primer</b>  |
|---------------------------|---------------------|----------------------------------|------------------------|
| <i>tyr</i> clone          | <i>Danio. Rerio</i> | AGGGTTCTGTCAGGACGTC              | GACTCTACATCGGCGGATG    |
| <i>dct</i> clone          | <i>Danio. Rerio</i> | AGCGCTTTGTGTTGATGCTG             | TGGTGCCGTTACACAGAGTC   |
| <i>tyrp1b</i> clone       | <i>Danio. Rerio</i> | GGAAGAGTGTGTGTTTAG-TGC           | AATCTTTGAACCATT-GGACGG |
| <i>htr2aa</i> sgRNA-1     | <i>Danio. Rerio</i> | ACATGGGACACAGTGATGCAG <u>GGG</u> |                        |
| <i>htr2aa</i> sgRNA-2     | <i>Danio. Rerio</i> | AATTGCACACAGGTGCATGA <u>TGG</u>  |                        |
| <i>htr2aa</i> sgRNA-3     | <i>Danio. Rerio</i> | TCTTGCCCCGGGCTCGGGAG <u>CGG</u>  |                        |
| <i>htr2aa</i> se-quencing | <i>Danio. Rerio</i> | TCATGCCTTCCCGTGAAATC             | ATTCACTCACTGCCTCACTC   |

## Supplemental Figure legends

**Supplemental Figure S1. The HTR2A agonists (DOI, TCB-2) and antagonists (Ketanserin, AT1015).** a-d. MTT assay to determine the cytotoxicity dosage of AT1015 (a), Ketanserin (b), DOI (c), TCB-2 (d) in B16F10 cells. e. Docking analysis of HTR2A protein with the four ligands.

**Supplemental Figure S2. HTR2A antagonists, Ketanserin inhibits the melanogenesis promotion effect of 5-HT in B16F10 cells and zebrafish embryos.** a. Masson-Fonta staining of B16F10 cells to show the melanocytes morphology and melanin content with the treatment of 5-HT (100  $\mu$ M), HTR2A antagonist ketanserin (30  $\mu$ M), and co-treatment. Scale bar, 50  $\mu$ m. b-c. Relative tyrosinase activity (b) and melanin content (c) in B16F10 cells treated with 5-HT (100  $\mu$ M) and different concentration ketanserin (1, 10, 30, 50  $\mu$ M) compared with control. The photos of melanin precipitation in the tube were on the top of the diagram (c). d. The morphology of melanocytes in zebrafish embryos at 60 hpf. The left coloumn shows the whole view of zebrafish embryos (lateral view). The right three coloumnns show the amplification photos of head (lateral view), trunk (lateral view) and head (dorsal view). Scale bar, 100  $\mu$ m.

**Supplemental Figure S3. HTR2A agonist TCB-2 induces melanogenesis in B16F10 cells.**

a. Masson-Fonta staining of B16F10 cells treated with HTR2A agonist TCB-2 (1, 3, 10  $\mu$ M).  $\alpha$ -MSH (50 nM) used as a positive control. Scale bar, 50  $\mu$ m. b-c. Relative tyrosinase activity (b) and melanin content (c) in B16F10 cells treated with different concentration TCB-2 (1, 3, 10  $\mu$ M) compared with control. The photos of melanin precipitation in the tube were on the top of the diagram (c). d. Western blot shows the protein expression of melanin synthesis, MITF and TYR in B16F10 cells treated with TCB-2 (1, 3, 10  $\mu$ M). e. Masson-Fonta staining of B16F10 cells with the treatment of TCB-2 (10  $\mu$ M), HTR2A antagonist AT1015 (3  $\mu$ M), and co-treatment. Scale bar, 50  $\mu$ m.

**Supplemental Figure S4. HTR2A agonist TCB-2 increases the melanogenesis in cultured human skin tissue and zebrafish embryos.**

a. The morphological photos, H&E staining and Masson-Fonta staining of human skin tissue treated with HTR2A agonist TCB-2 (30, 50, 100  $\mu$ M). Scale bar, 100 mm (morphology of skin tissue), 50  $\mu$ m (H&E staining and Masson-Fonta staining). b. Relative melanin content in human skin tissue treated with TCB-2 (30, 50, 100  $\mu$ M) compared with control. c. Western blot shows the protein expression of MITF and TYR in human skin tissue treated with TCB-2 (30, 50, 100  $\mu$ M). d. The morphology of melanocytes in zebrafish embryos at 60 hpf treated with TCB-2 (1, 10, 30, 50  $\mu$ M) from 35-60 hpf. The left coloumn shows the whole

view of zebrafish embryos (lateral view). The right three columns show the amplification photos of head (lateral view), trunk (lateral view) and head (dorsal view). Scale bar, 100  $\mu$ m.

**Supplemental Figure S5. The establishment of zebrafish *htr2aa* knockout line, *htr2aa<sup>cpu5</sup>* and *htr2aa<sup>cpu6</sup>*.**

a. The genome structure of zebrafish *htr2aa* and the sequence of sgRNA target (green). The red base sequence indicates the PAM. b. The genome and protein sequence of the two *htr2aa* mutant line, *htr2aa<sup>cpu5</sup>* and *htr2aa<sup>cpu6</sup>*.

**Supplemental Figure S6. HTR2A agonist TCB-2 induces dendrites and migration of B16F10 cells.**

a. The cell morphology of B16F10 cells treated with different concentration TCB-2 (1, 3, 10  $\mu$ M).  $\alpha$ -MSH (50 nM) used as a positive control. Scale bar, 50  $\mu$ m. b-c The dendritic number (b) and length (c) of the B16F10 cells treated with different concentration TCB-2 (1, 3, 10  $\mu$ M). d. Western blot shows the protein expression of GP100 (melanosome organization), RAB7/17/27 (melanosome transport), RAC1 and CDC42 (melanocytes dendrites) in B16F10 cells treated with TCB-2 (1, 3, 10  $\mu$ M). e. Phalloidin staining shows the cytoskeleton in B16F10 cells treated with TCB-2 (1, 3, 10  $\mu$ M). DAPI used to mark the nucleus. The right row is the partial enlargement of the photos on the left. Scale bar, 20  $\mu$ m (left), 10  $\mu$ m (right). f. Cell scratch experiments show the migration of B16F10 after treated with TCB-2 (1, 3, 10  $\mu$ M) from 0-24 hours. Scale bar, 10 mm.

**Supplemental Figure S7. PKA/CREB signaling pathway mediates the melanogenesis promotion effect of HTR2A agonist TCB-2.**

a-b. The relative protein expression of phospho-CREB in B16F10 cells treated with DOI (30  $\mu$ M) or TCB-2 (10  $\mu$ M). c. Western blot shows the protein expression of phospho-CREB and total CREB in B16F10 cells after treated with TCB-2 (10  $\mu$ M) from 0-14 hours. d. Relative melanin content in B16F10 cells treated with TCB-2 (10  $\mu$ M), H89 (the inhibitor of PKA signaling, 5  $\mu$ M) and co-treatment compared with control. The photos of melanin precipitation in the tube were on the top of the diagram. e. Western blot shows the protein expression of MITF and TYR (melanin synthesis), GP100 (melanosome organization), RAB7/17/27 (melanosome transport), RAC1 and CDC42 (melanocytes dendrites) in B16F10 cells treated with TCB-2 (10  $\mu$ M), H89 (5  $\mu$ M) and co-treatment.

**Supplemental Figure S8-9. CAMK signaling is not the key downstream to regulate melanogenesis of HTR2A agonist DOI (Figure S8) and TCB-2 (Figure S9) in B16F10 cells.**



a. Western blot shows the protein expression of phospho-CAMKII and total CAMKII- $\gamma$  in B16F10 cells after treated with DOI (10, 20, 30  $\mu$ M) (Figure S8 a) or TCB-2 (1, 3, 10  $\mu$ M) (Figure S9 a). b. Western blot shows the protein expression of phospho-CAMKII and total CAMKII- $\gamma$  in B16F10 cells after treated with DOI (30  $\mu$ M) (Figure S8 b) or TCB-2 (10  $\mu$ M) (Figure S9 b) from 0-120 minutes. c-d. The quantitative analysis of protein expression in Figure S8 c-d and Figure S9 c-d. e. Relative melanin content in B16F10 cells treated with DOI (30  $\mu$ M) (Figure S8 e) or TCB-2 (10  $\mu$ M) (Figure S9 e), KN93 (the inhibitor of CAMK signaling, 1  $\mu$ M) and co-treatment compared with control. The photos of melanin precipitation in the tube were on the top of the diagram. f. Western blot shows the protein expression of MITF and TYR (melanin synthesis), GP100 (melanosome organization), RAB7/17/27 (melanosome transport), RAC1 and CDC42 (melanocytes dendrites) in B16F10 cells treated with DOI (30  $\mu$ M) (Figure S8 f) or TCB-2 (10  $\mu$ M) (Figure S9 f) and KN93 (1  $\mu$ M) or co-treatment.

**Supplemental Figure S10. ERK signaling is transient activated in B16F10 cell with HTR2A agonist DOI and TCB-2.** a and c. Western blot shows the protein expression of phospho-p38, phospho-ERK1/2, phospho-JNK and total p38, ERK1/2, JNK in B16F10 cells after treated with DOI (30  $\mu$ M) (a) or TCB-2 (10  $\mu$ M) (c) from 0-120 minutes. b and d. The quantitative analysis of protein expression.

**Supplemental Figure S12-14. The quantitative analysis of protein expression.**

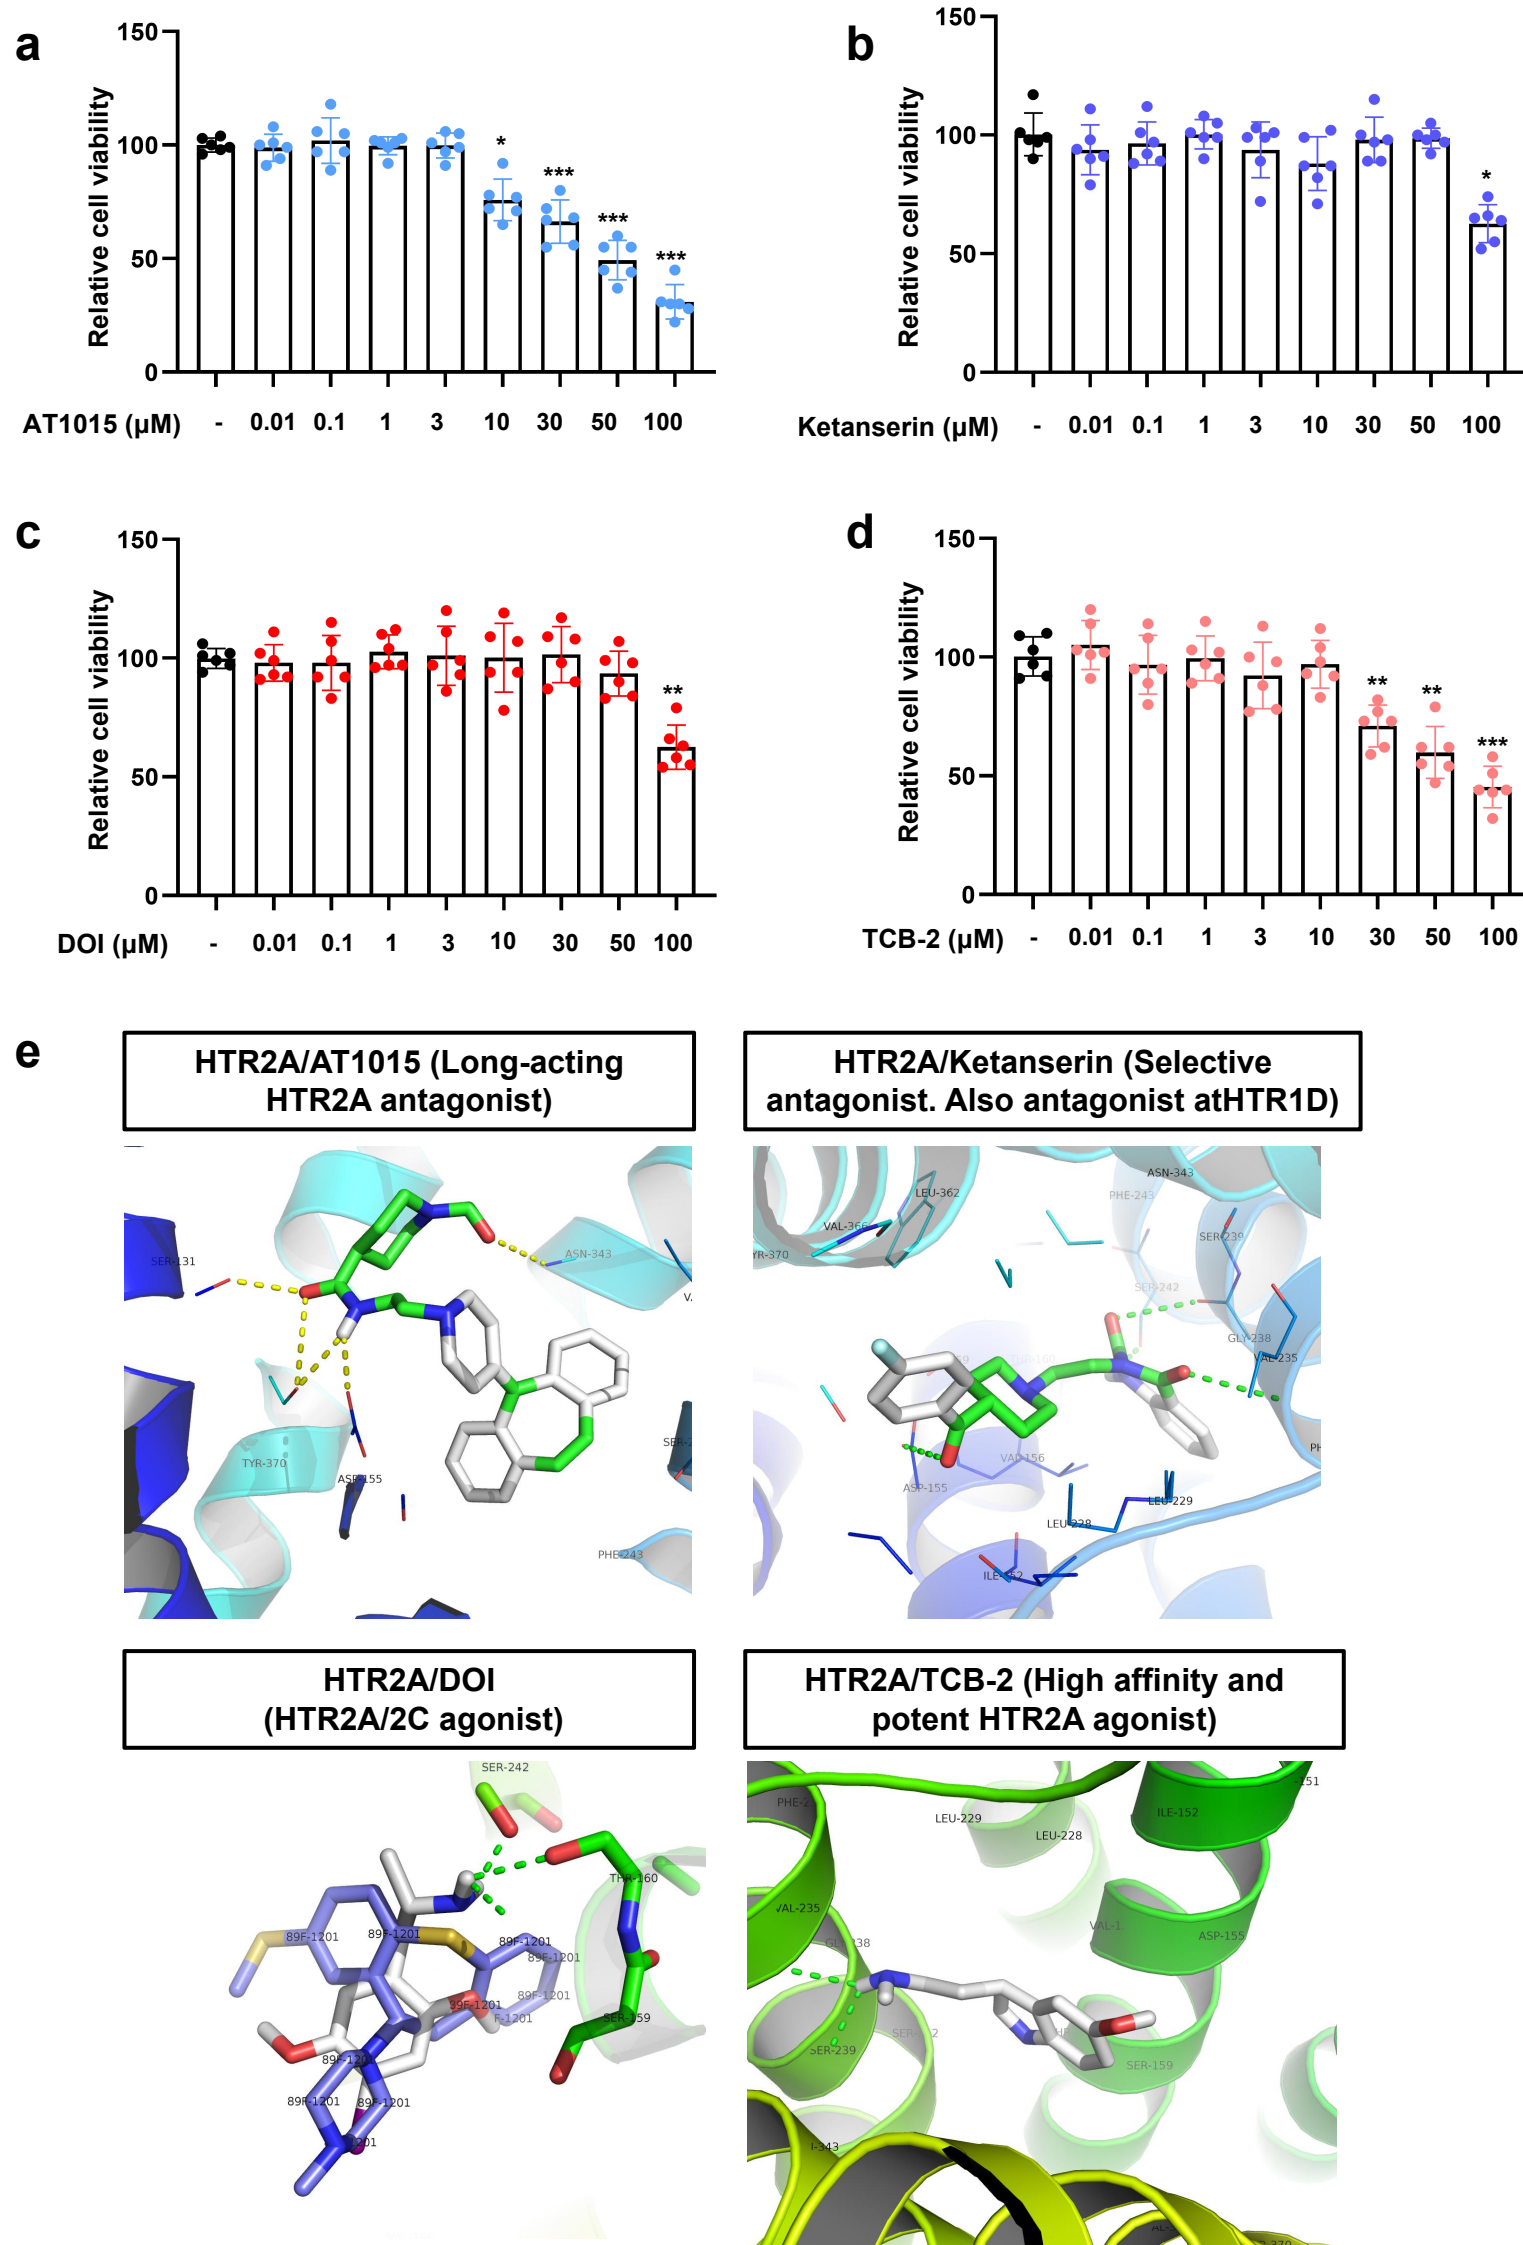



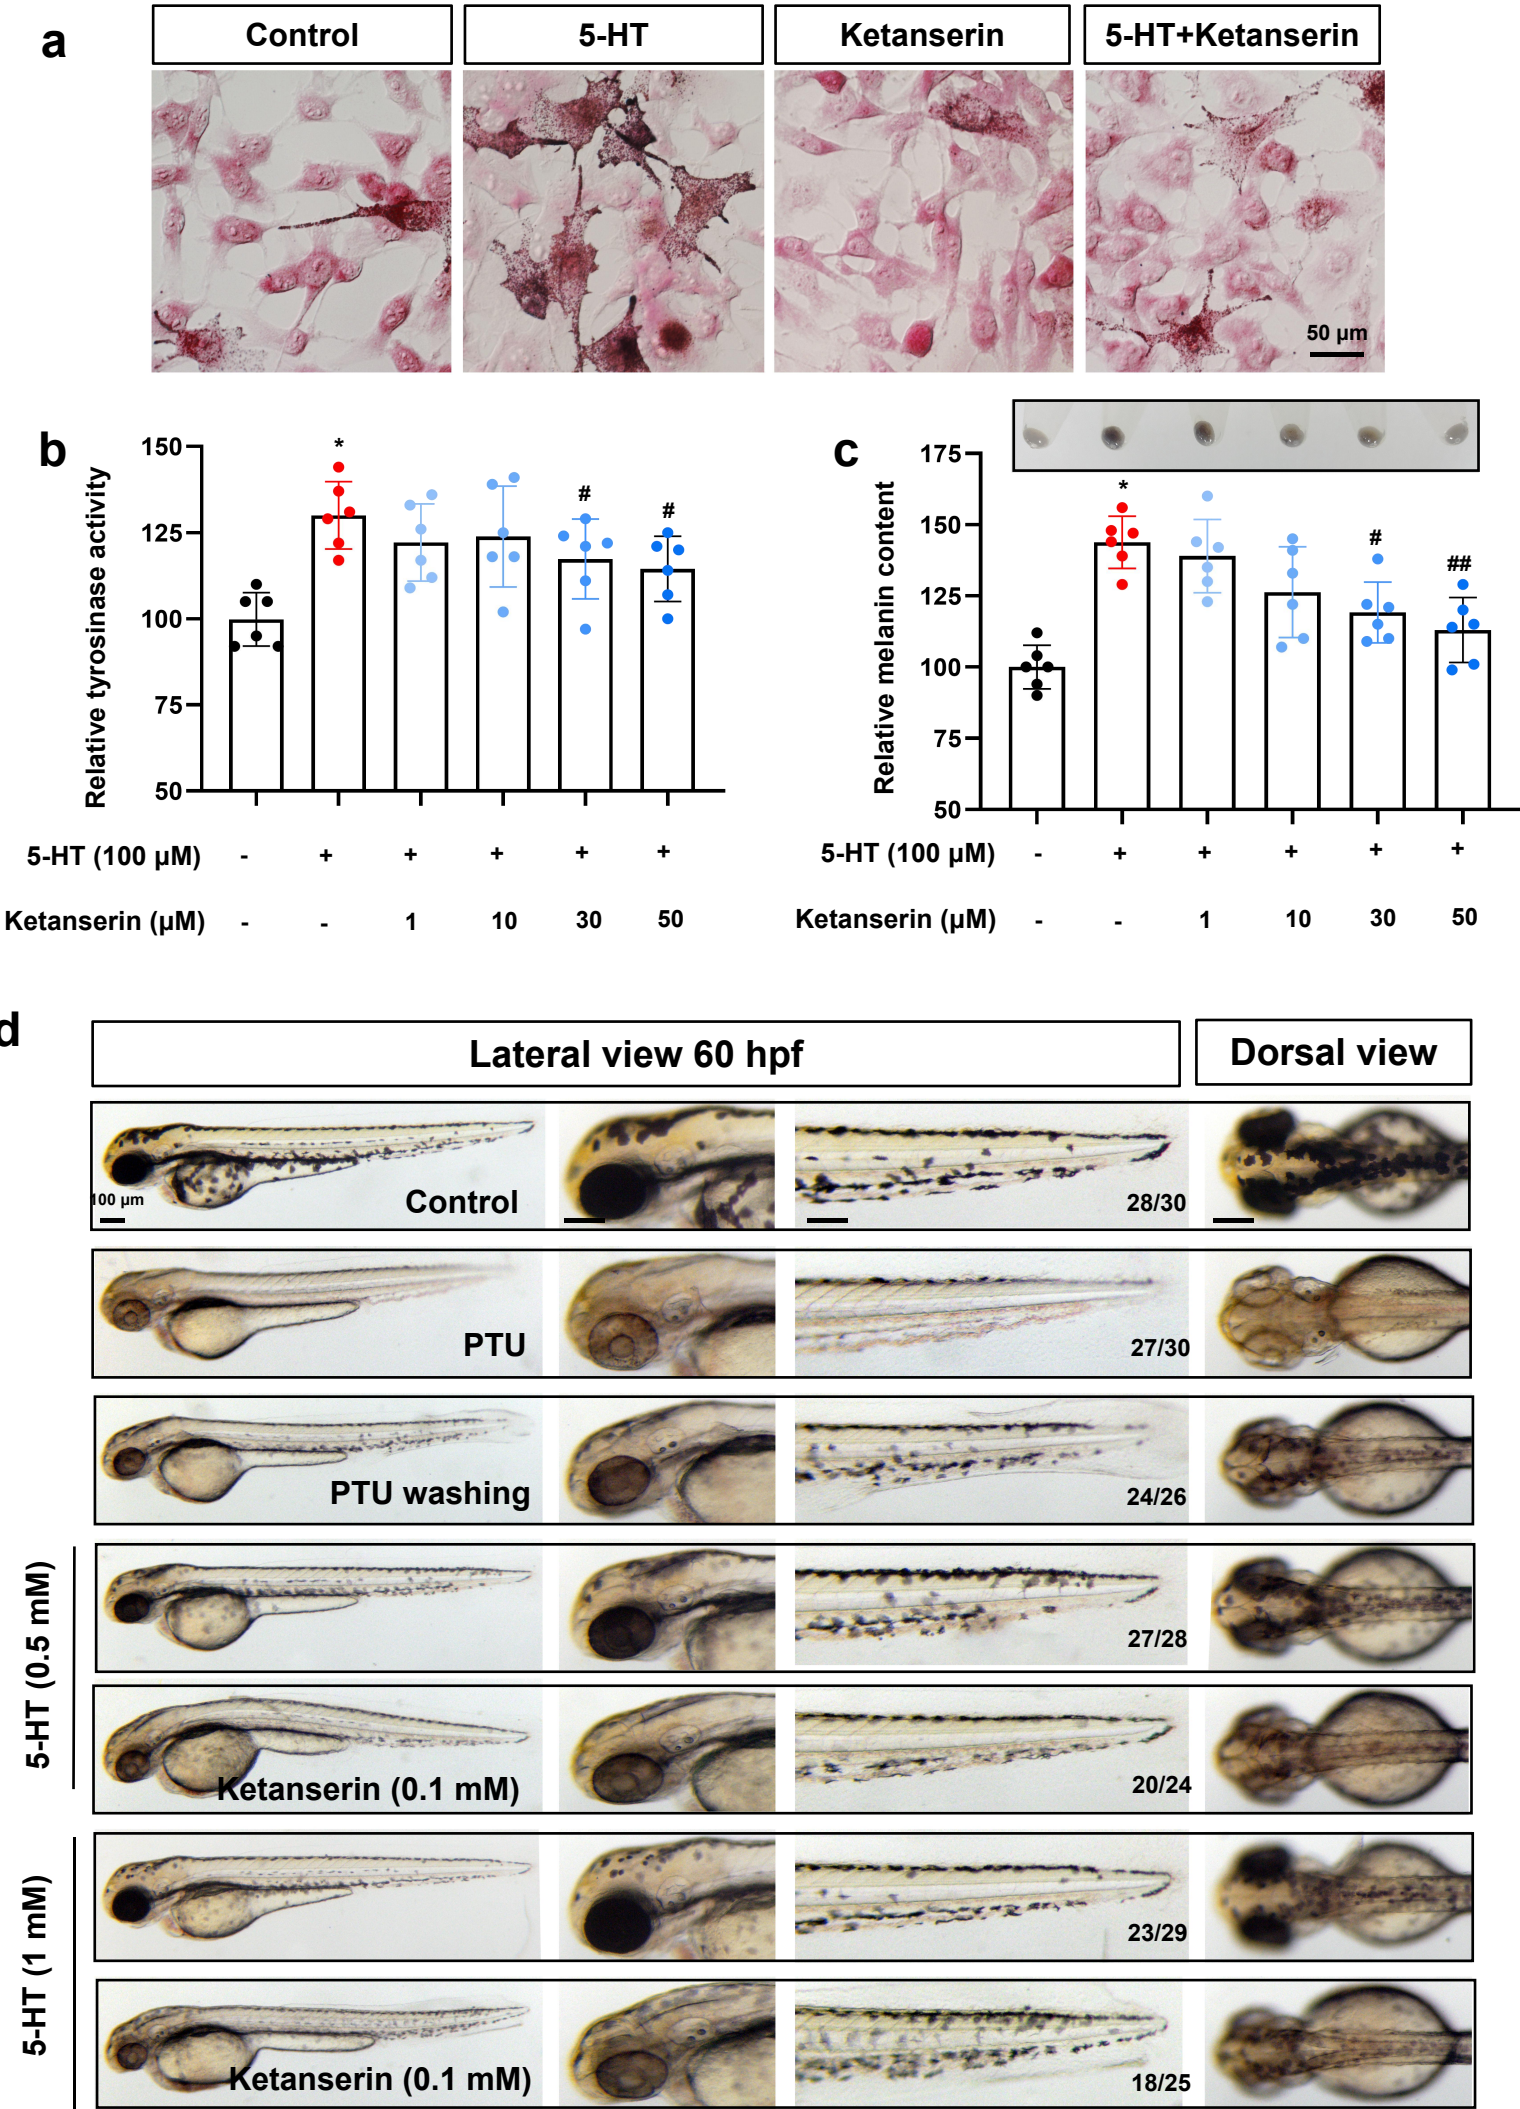



**a**

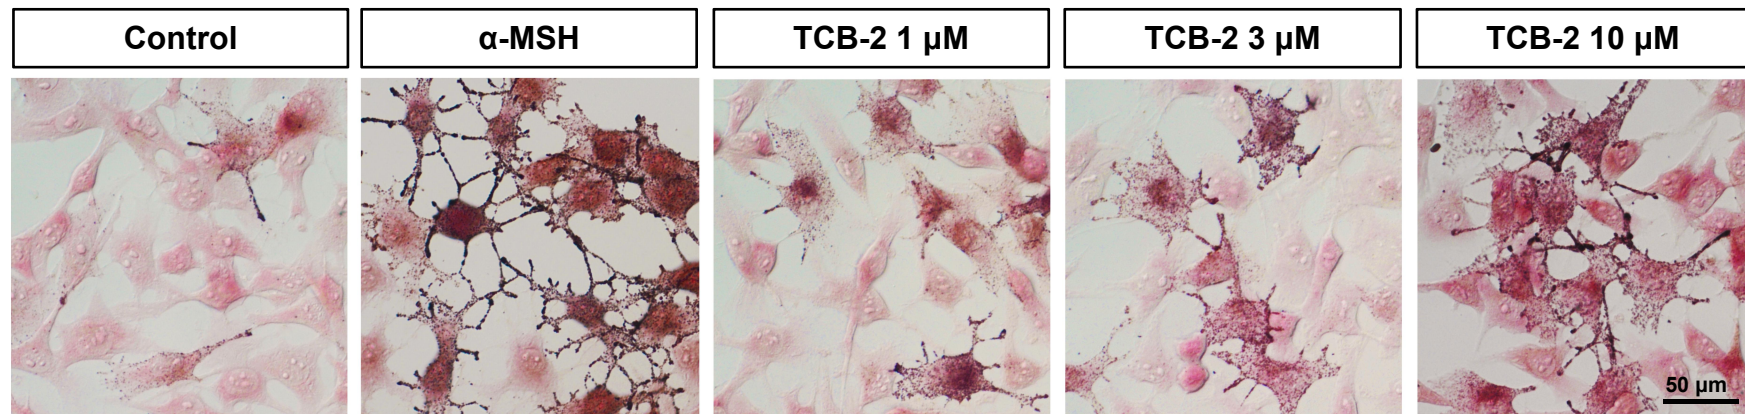

**b**

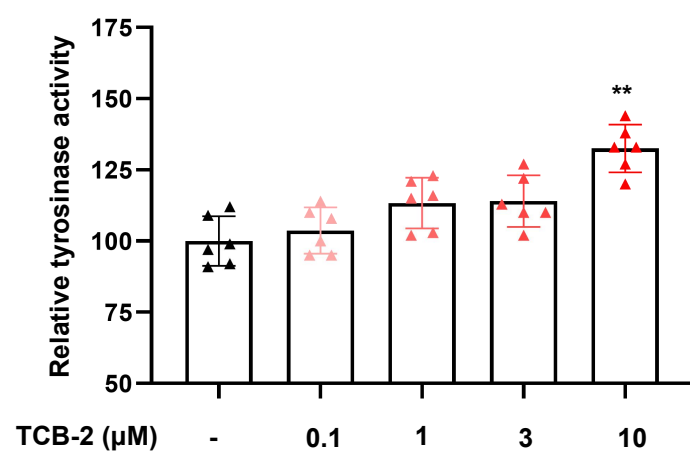

**c**

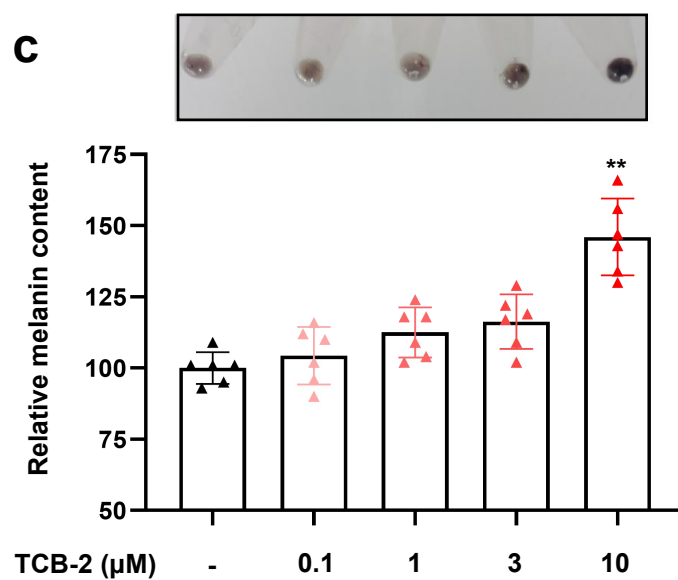

**d**

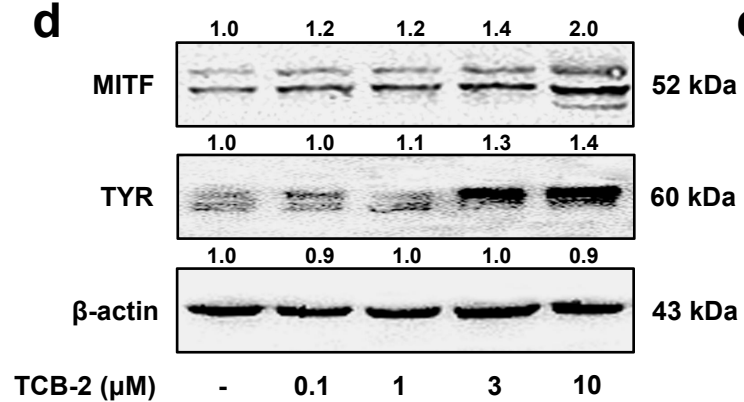

**e**

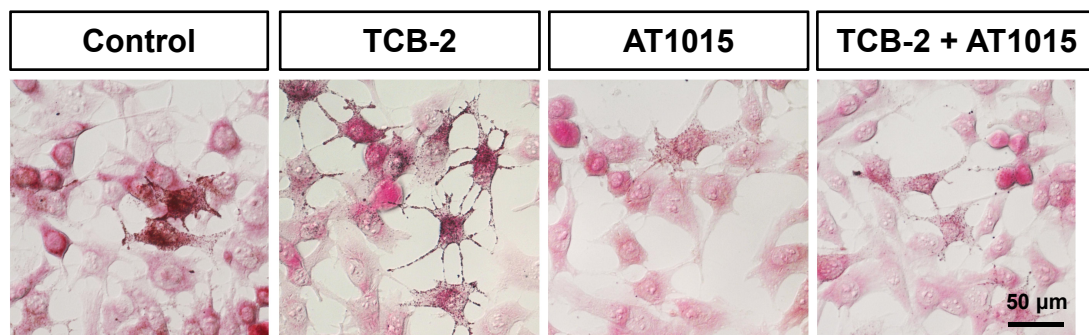



**Figure S4**

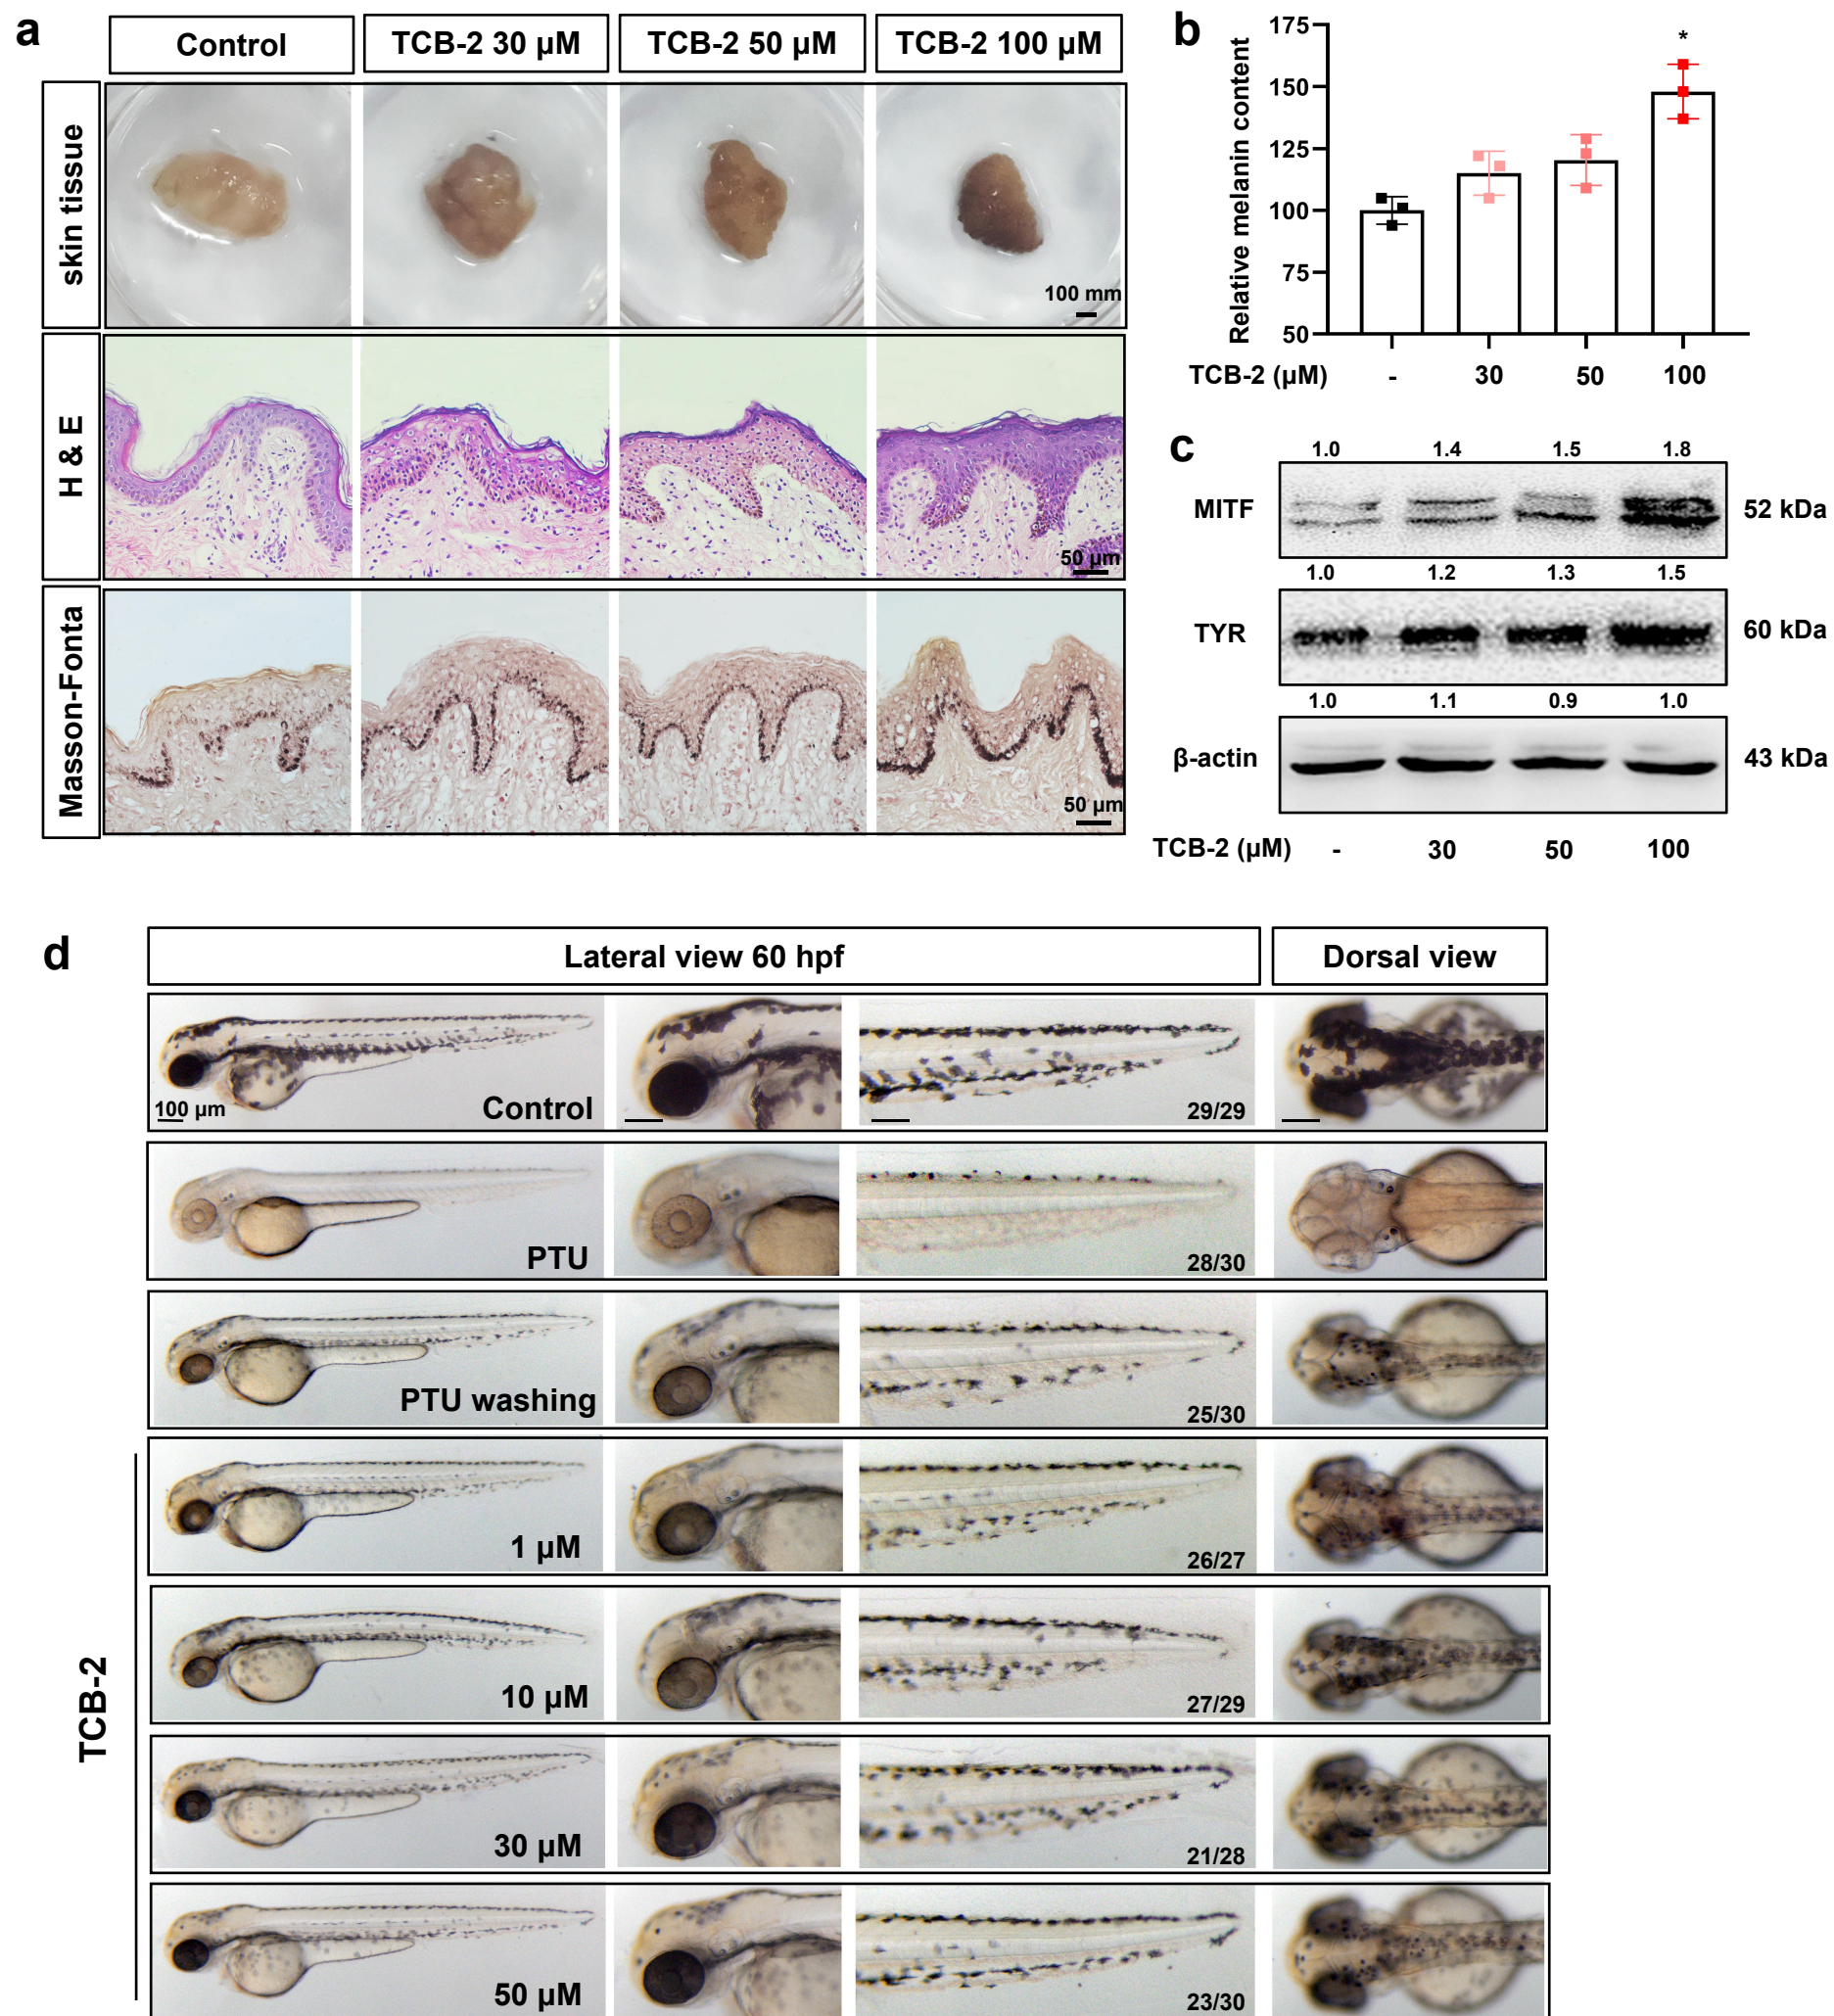

a

zebrafish *htr2aa* genome

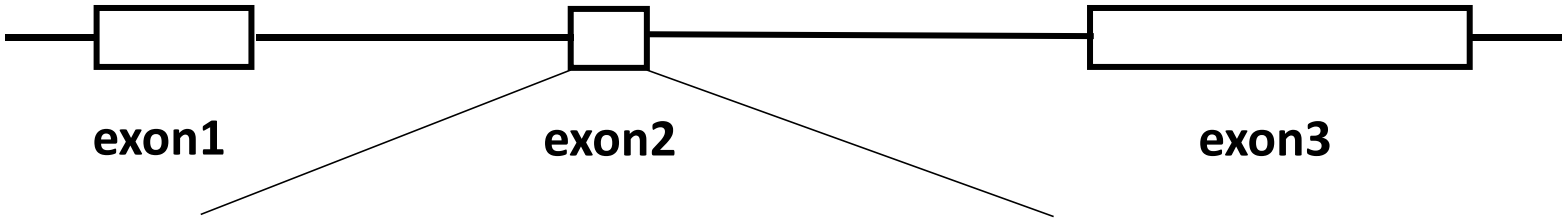

GTTACTCATGGCCTTT**CCCTGCATCACTGTGTCCCATGTGGATCTACCTAGATGTGCTCTTC**  
TCCACCGCCT**CCATCATGCACCTGTGTGCAATT**TCTCTTGACCGCTATGTGGCCATTCGTAA  
CCCCATCCGACACAATCGGTCAAATT**CCCGCTCCCGAGCCCGGGCCAAG**ATTACGGCAGTCT  
GGACCATCTCTGCAG

b

|                               |                                                                                     |          |
|-------------------------------|-------------------------------------------------------------------------------------|----------|
| <i>htr2aa</i> <sup>+/+</sup>  | TCATGGCCTTT <b>CCCTGCATCACTGTGTCCCATGTGGATCTACCTAGA</b>                             |          |
| <i>htr2aa</i> <sup>cpu5</sup> | TCATGGCCTTT <b>C</b> ----- <b>ACTGTGTCCCATGTGGATCTACCTAGA</b>                       | Δ8 bp    |
| <i>htr2aa</i> <sup>cpu6</sup> | TCATGGCCTTT <b>CCCTG</b> -- <b>TCATGTGTCCCATGTGGATCTACCTAGA</b>                     | Δ2+10 bp |
|                               | <div style="margin-left: 100px;">/                    \<br/><b>TGTCCCTGTG</b></div> |          |
| Htr2aa <sup>+/+</sup>         | DMLLGLLVMPVSMVTIVYGYSWPF <b>PAS</b> LCPMWIYLDVLF-----*                              | 491 aa   |
| Htr2aa <sup>cpu5</sup>        | DMLLGLLVMPVSMVTIVYGYSWPF <b>TVSHVDLPR</b> -----*                                    | 163 aa   |
| Htr2aa <sup>cpu6</sup>        | DMLLGLLVMPVSMVTIVYGYSWPF <b>PVSLCHCVPCGST</b> *                                     | 162 aa   |



Figure S6

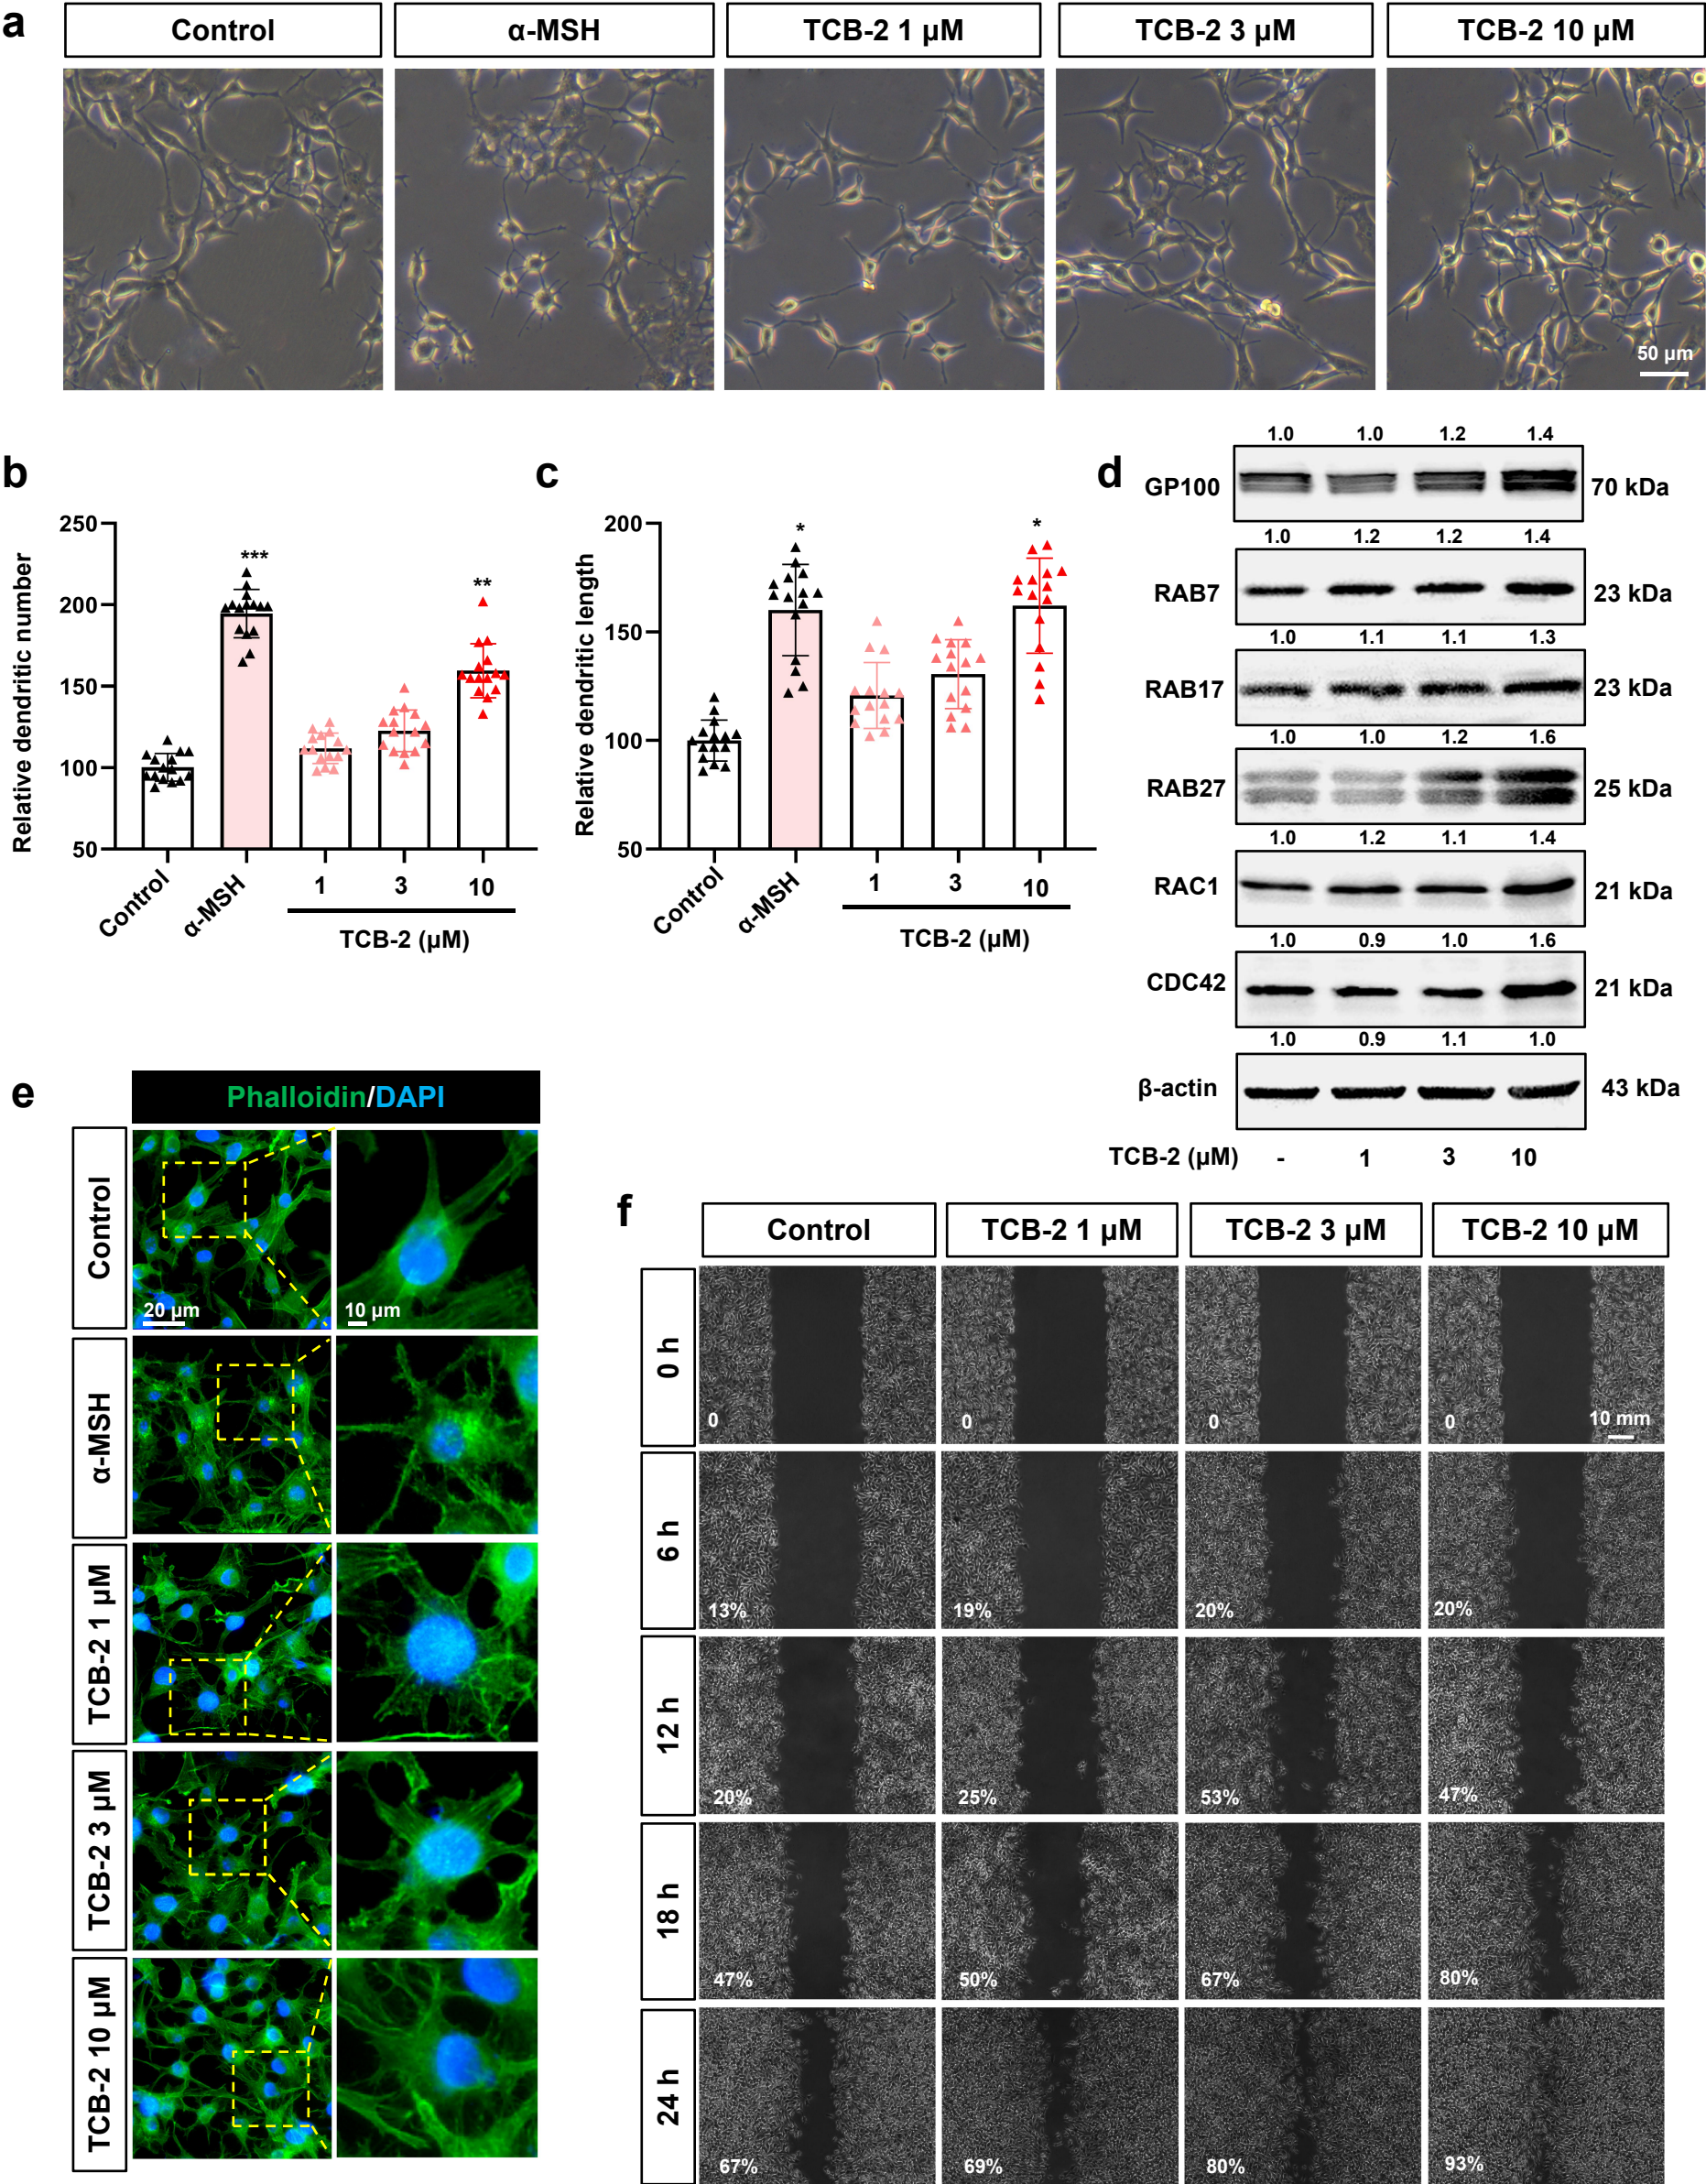



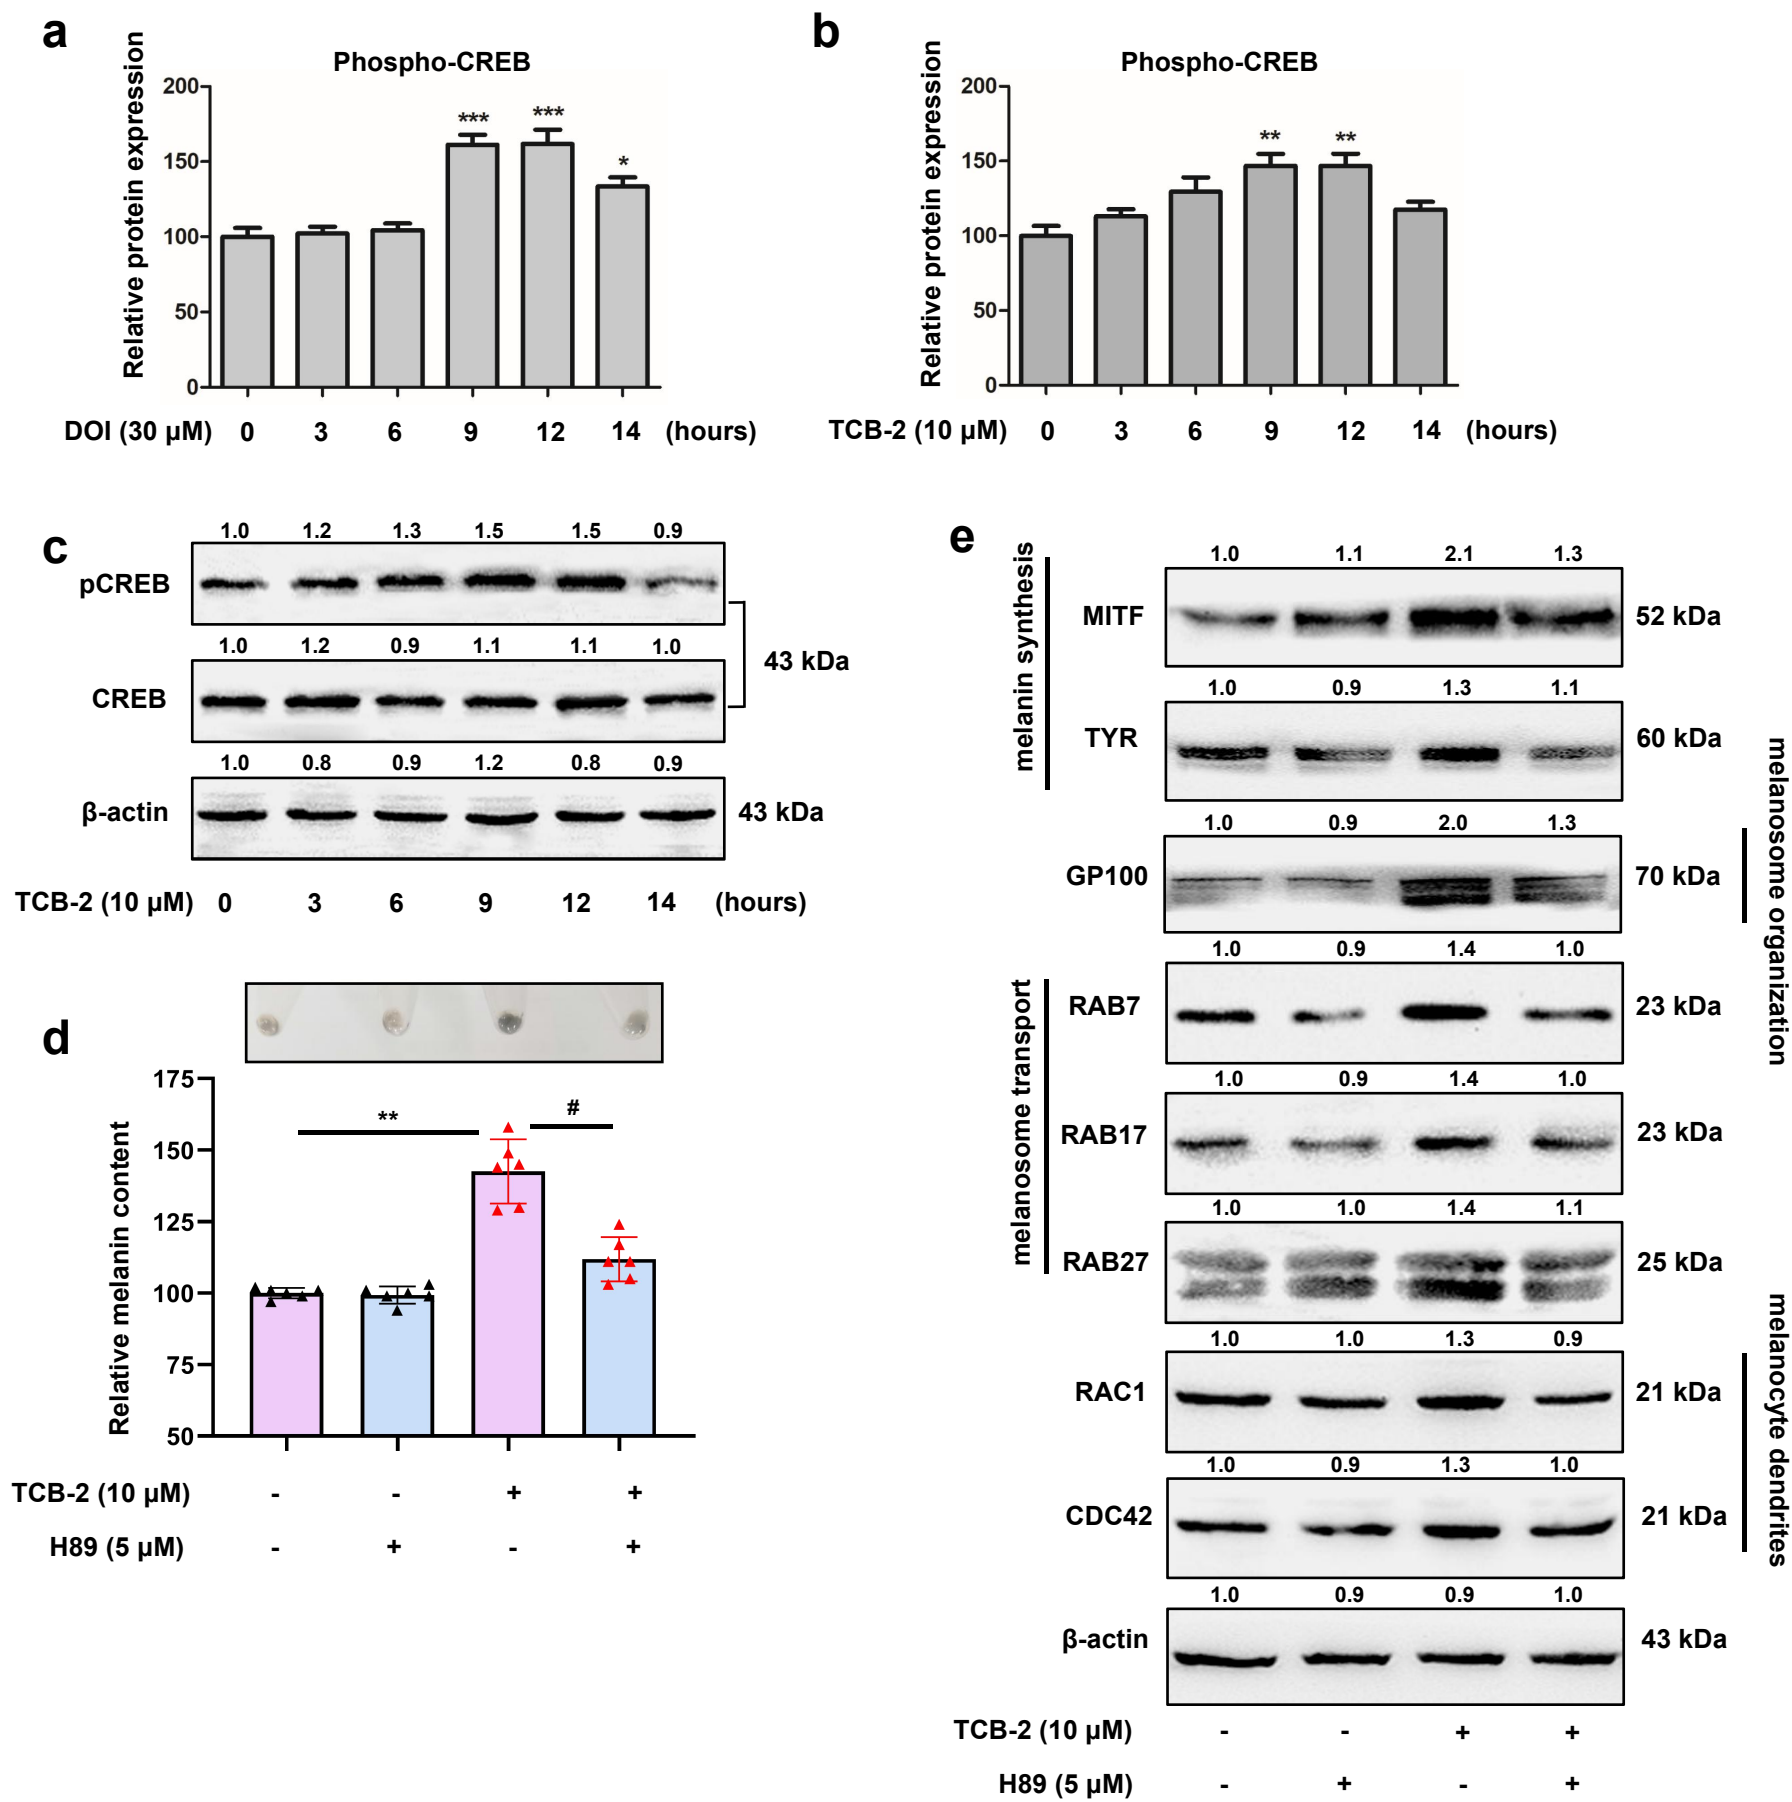



Figure S8

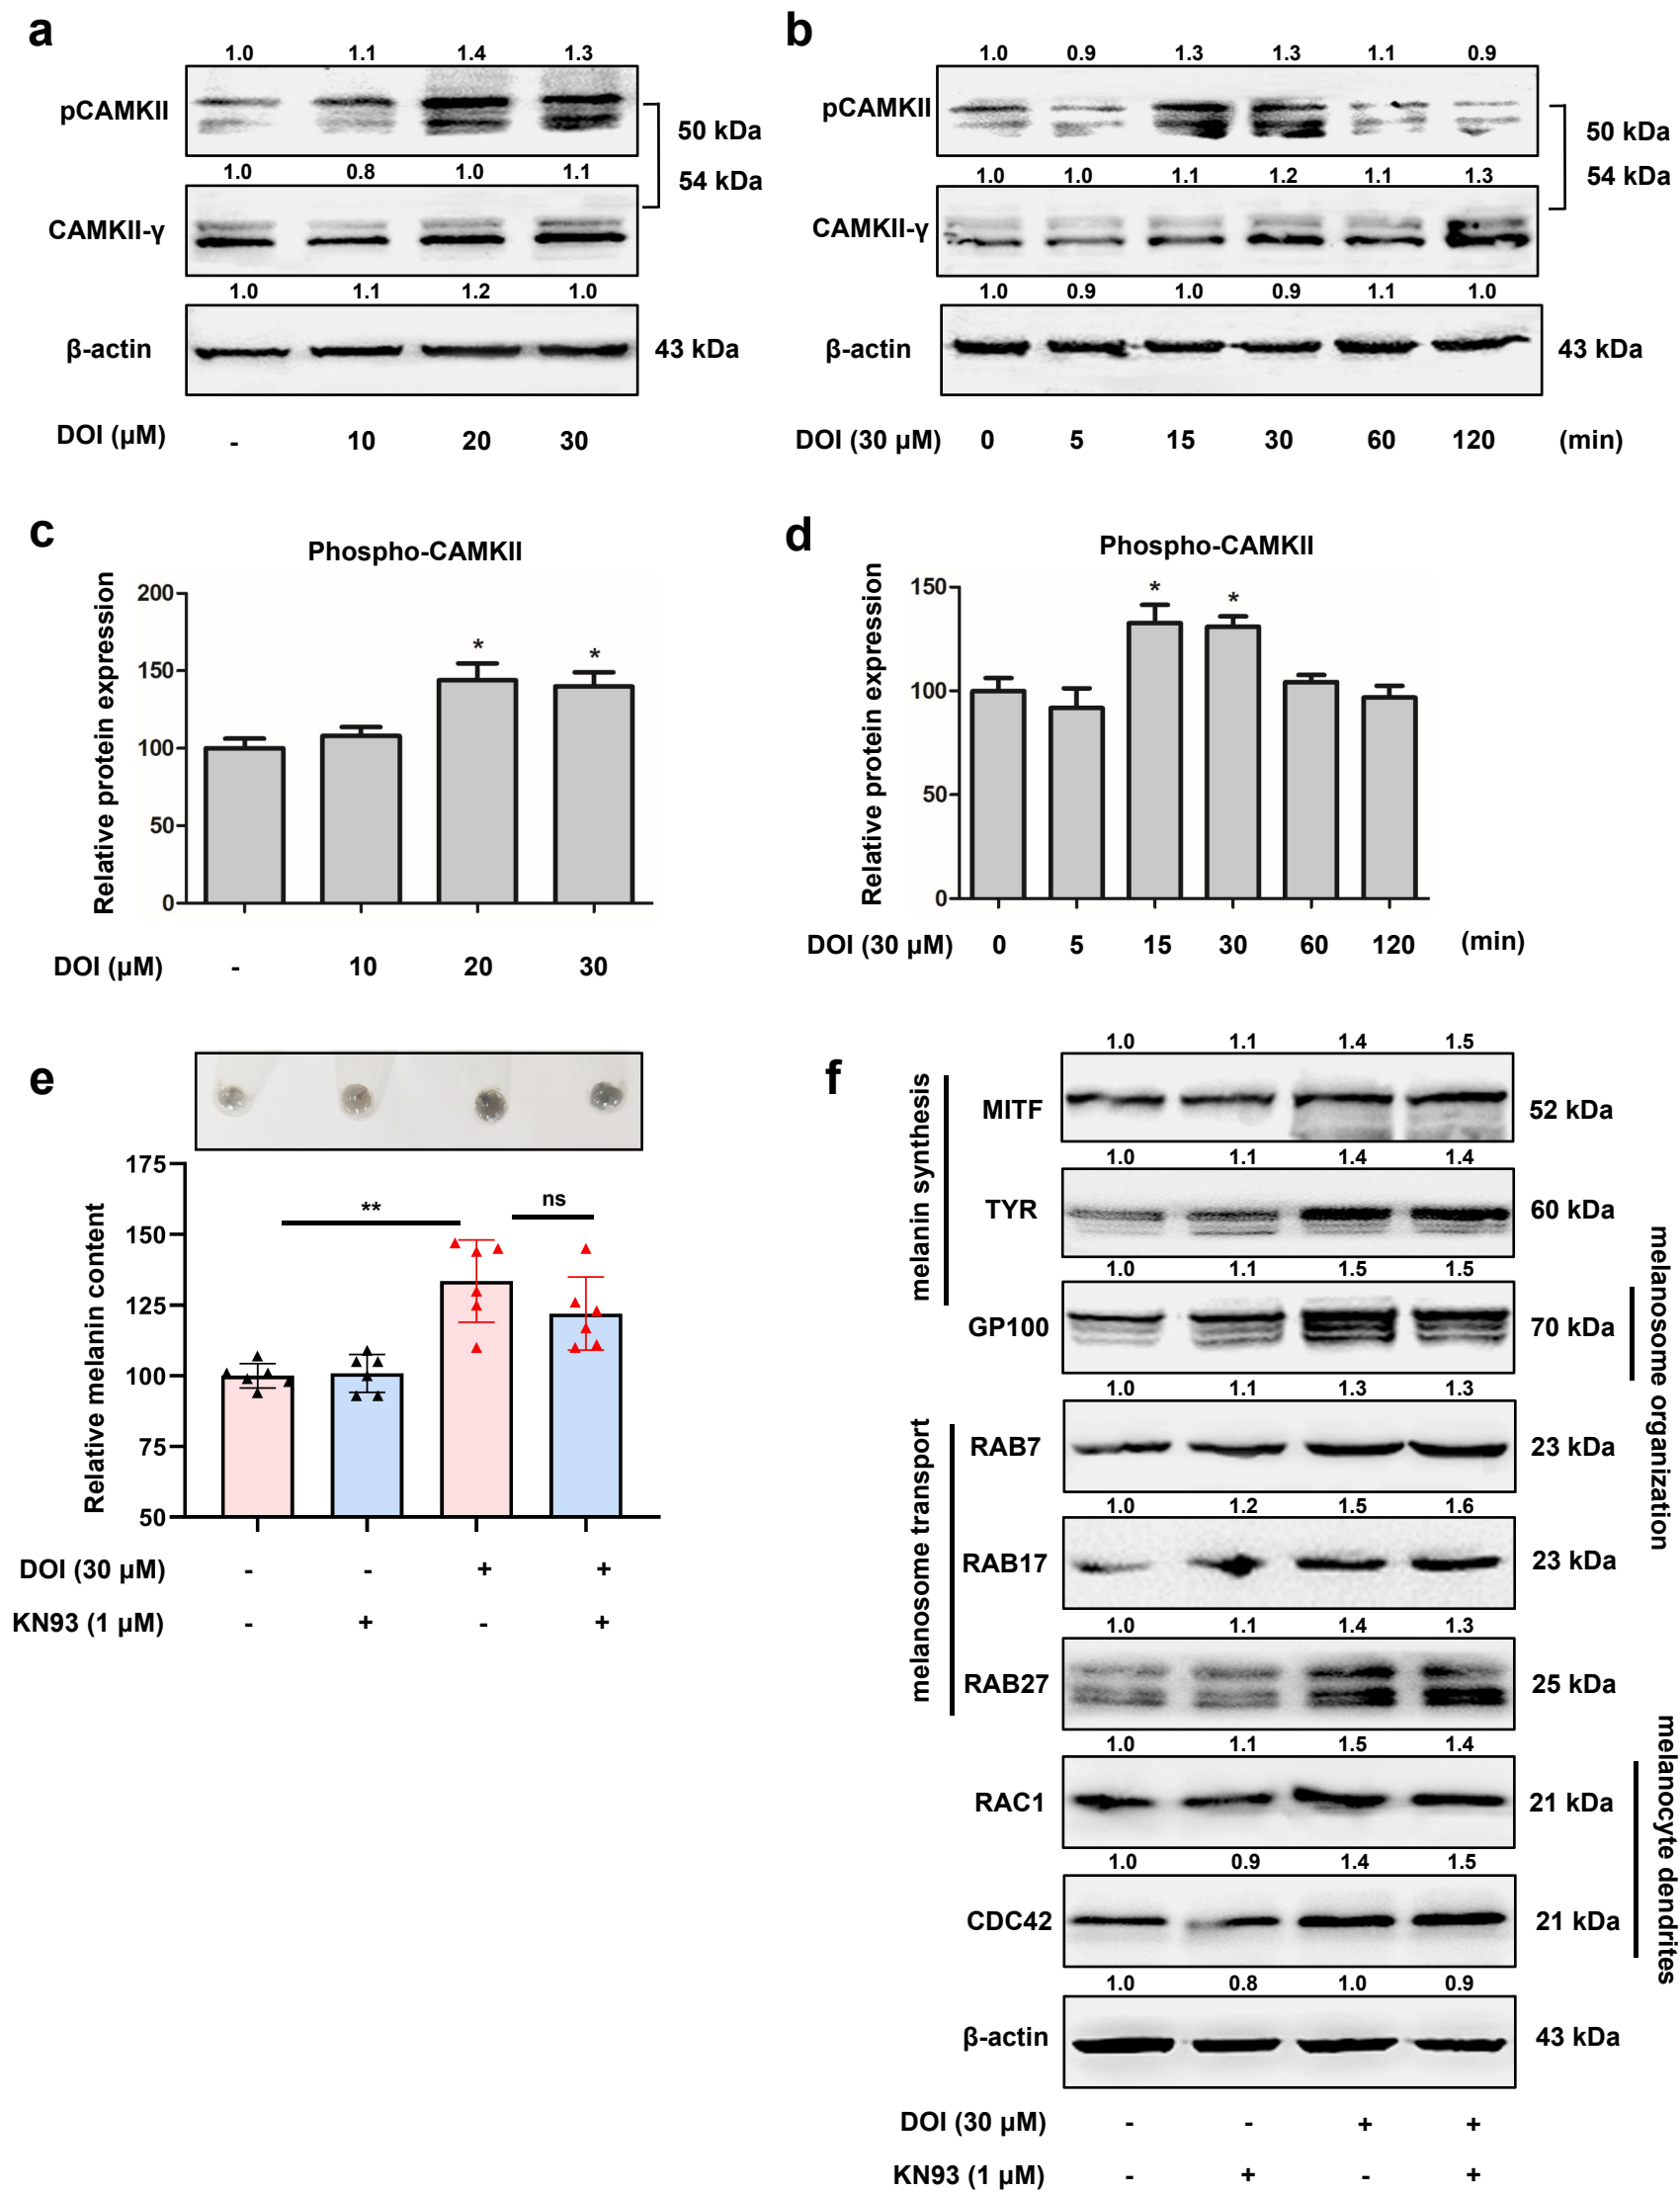

Figure S9

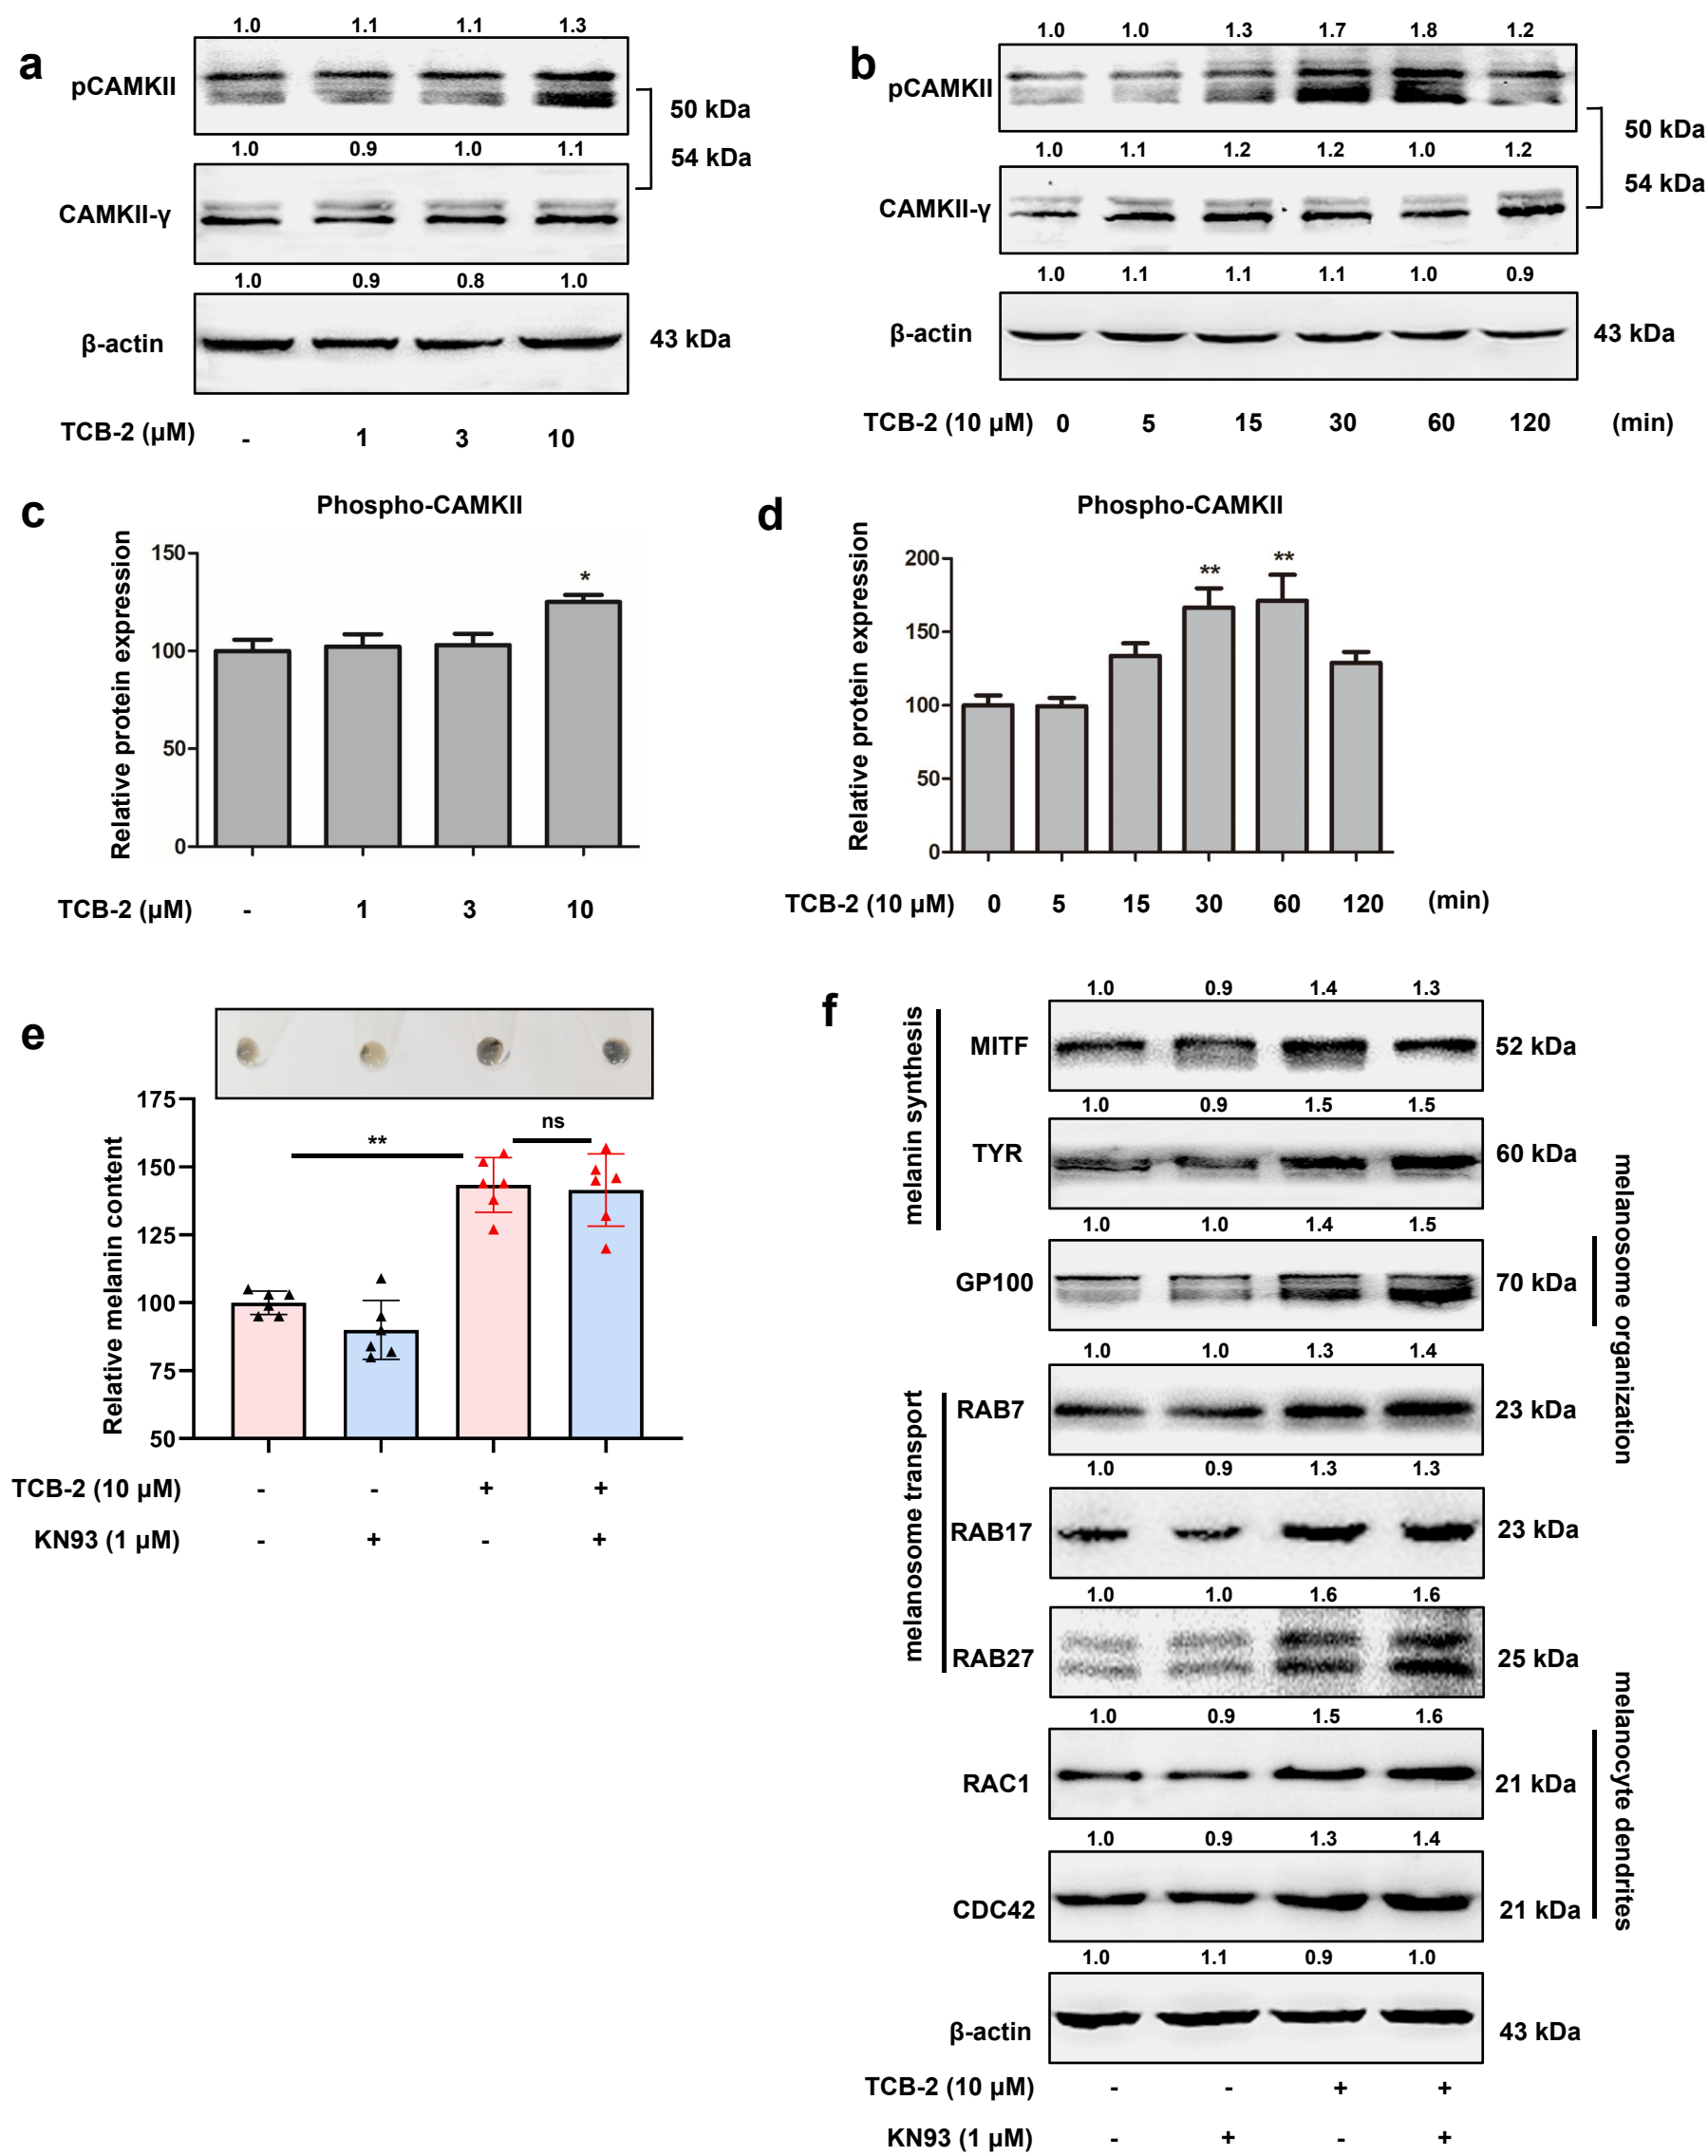

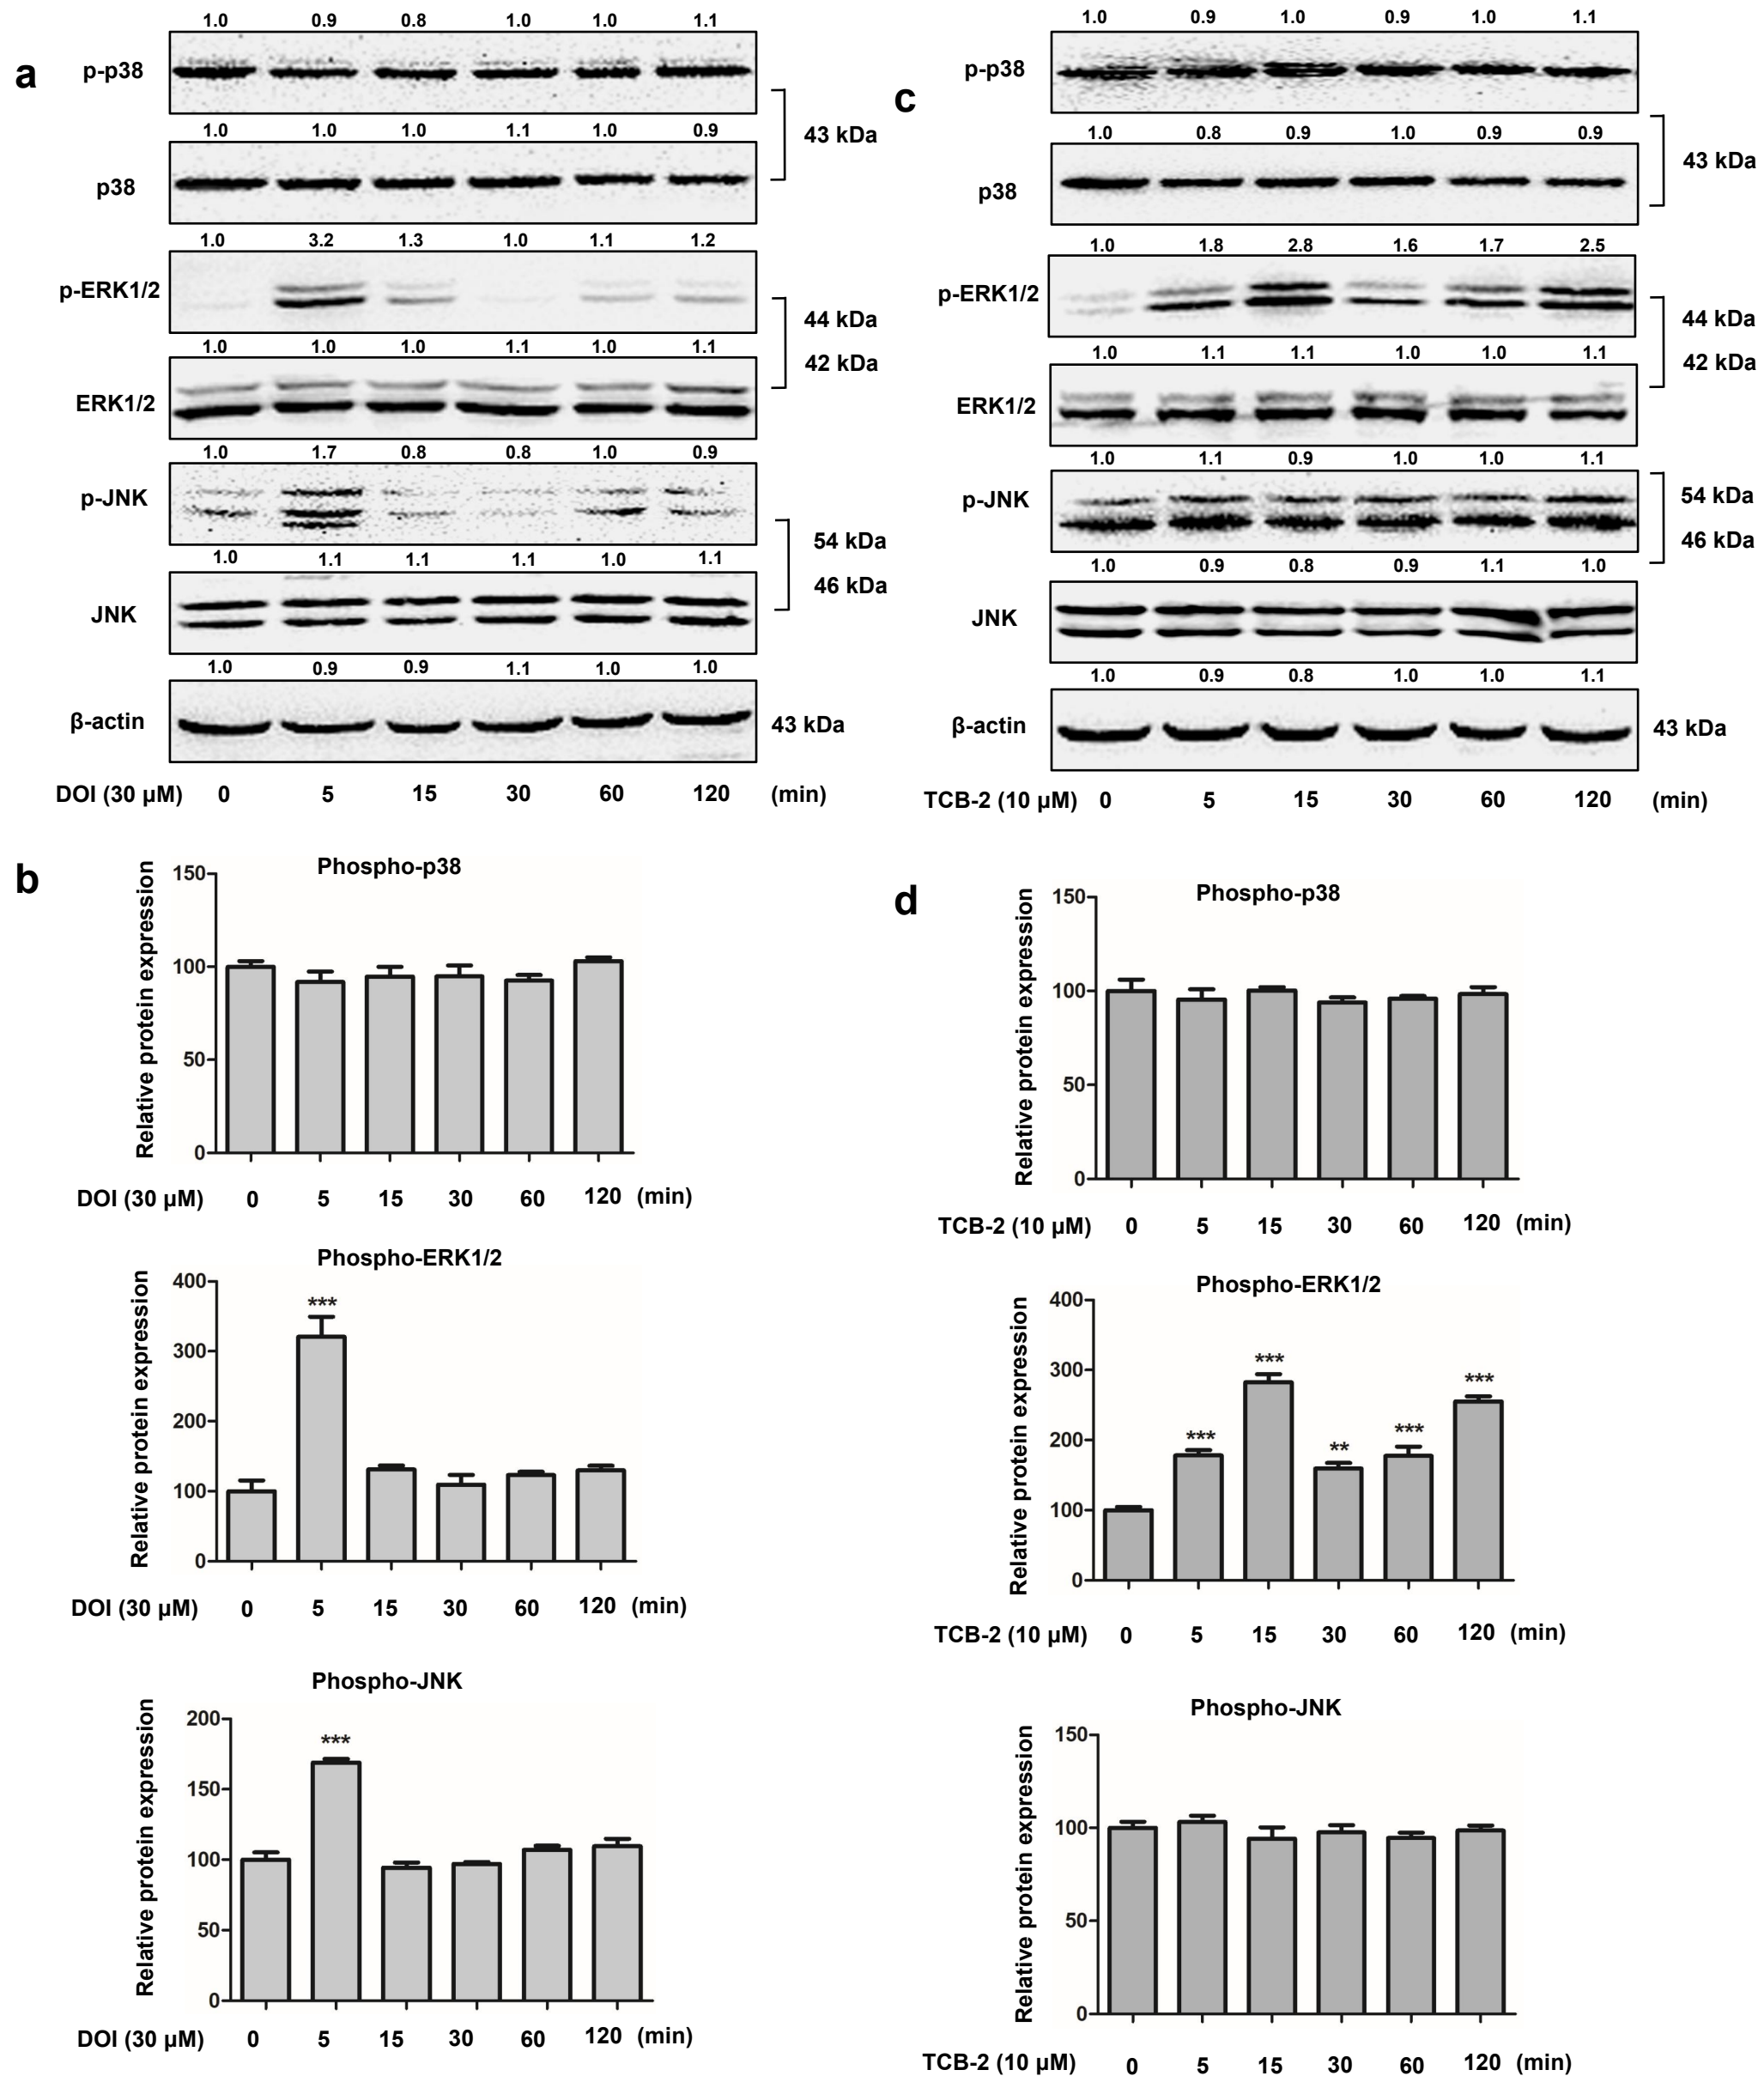

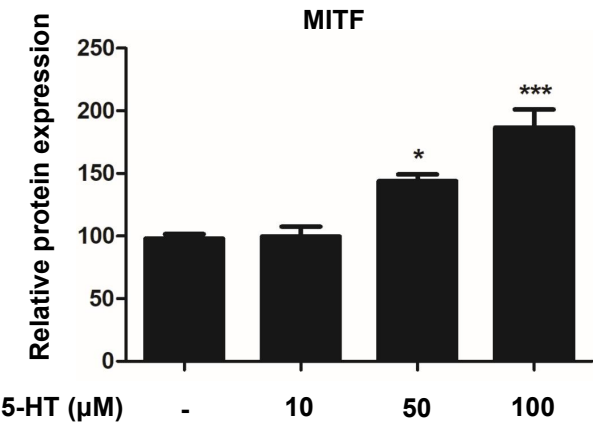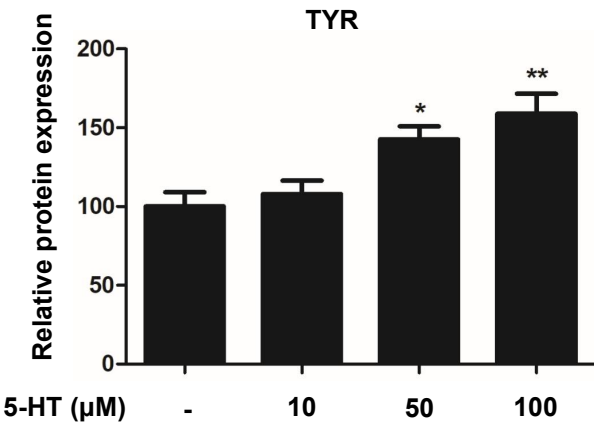

Related to Fig. 1D

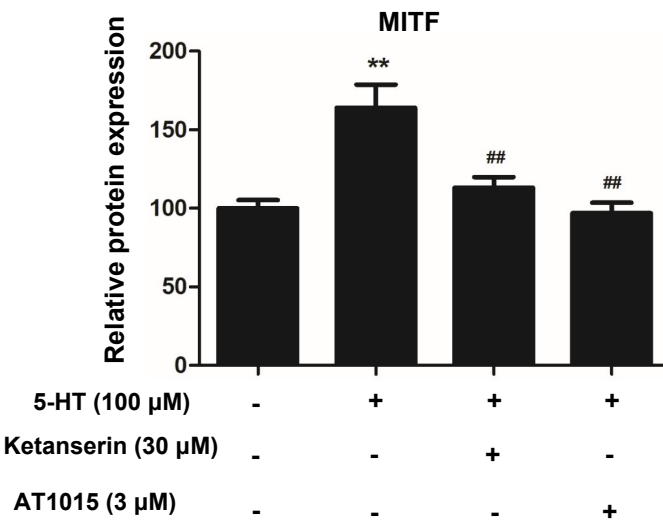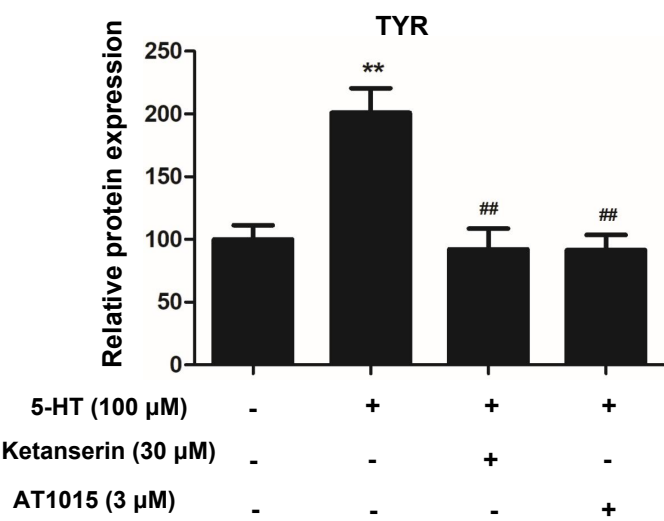

Related to Fig. S2E

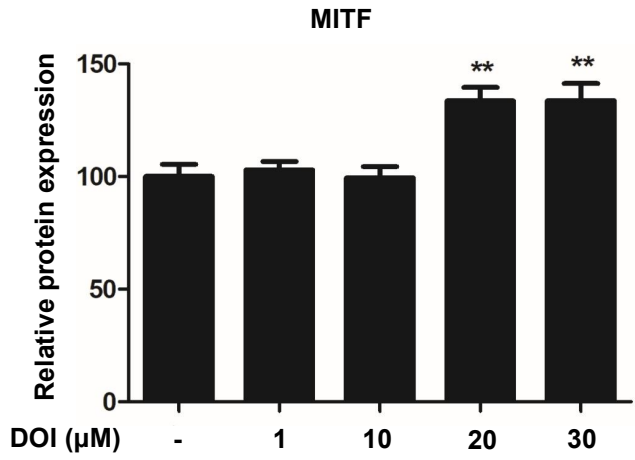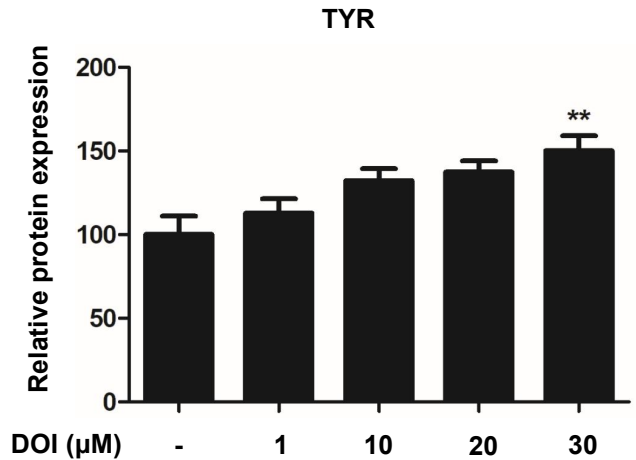

Related to Fig. 3D

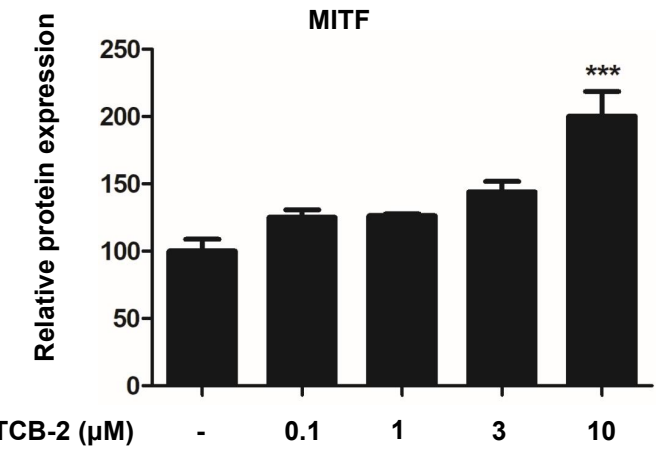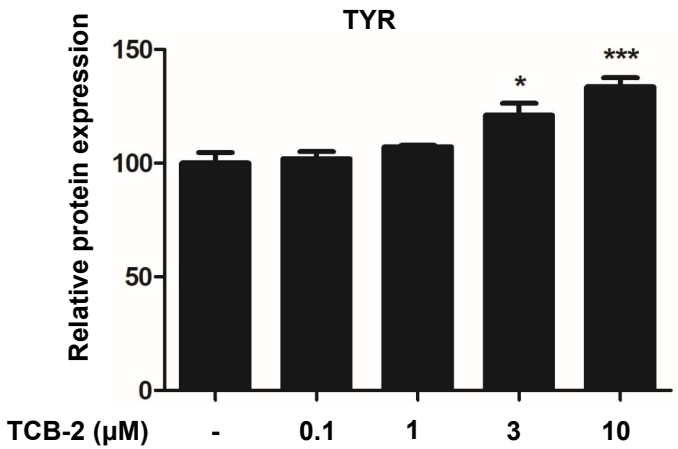

Related to Fig. S4D

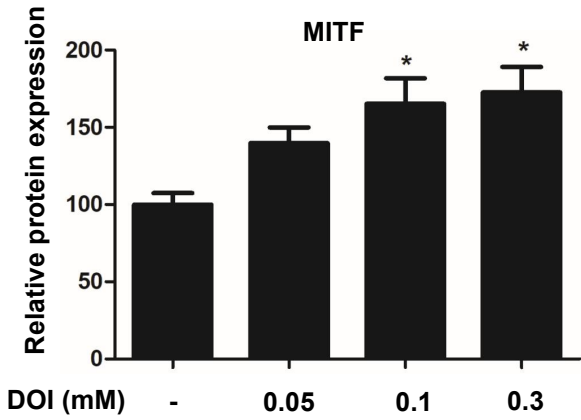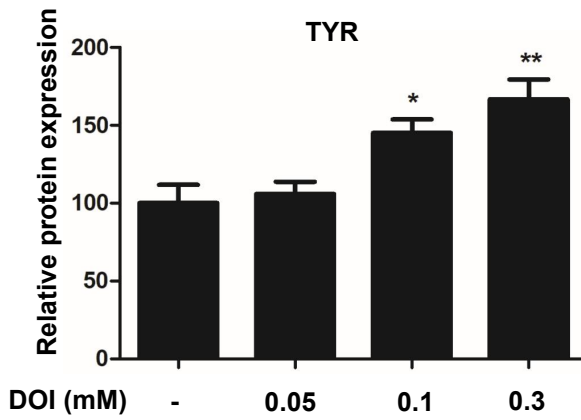

Related to Fig. 4C

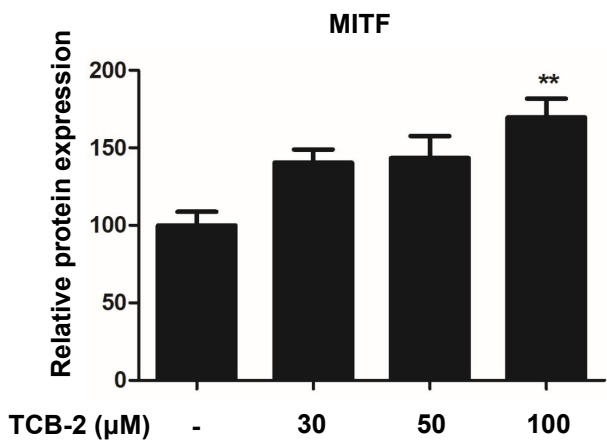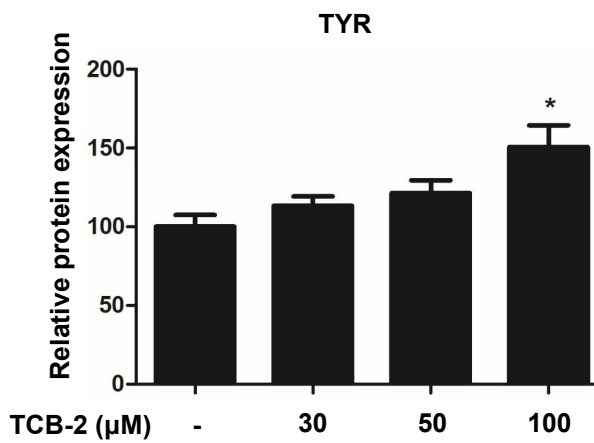

Related to Fig. S5C

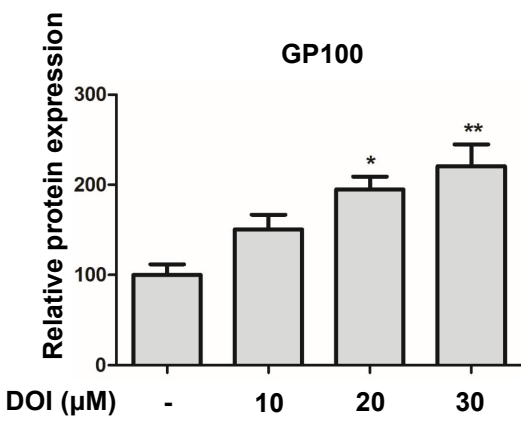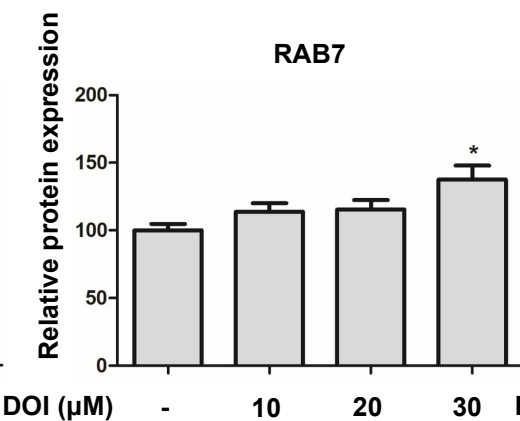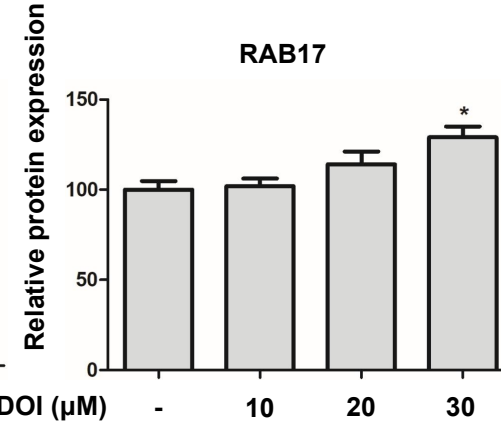

Related to Fig. 6D

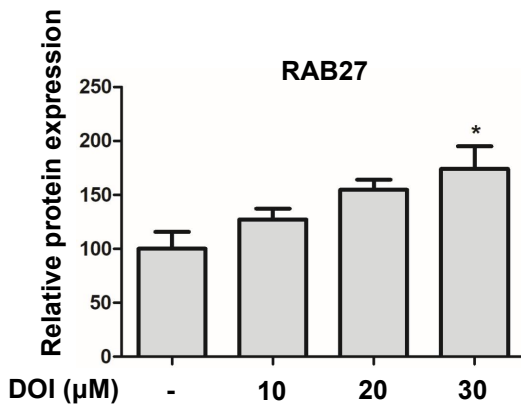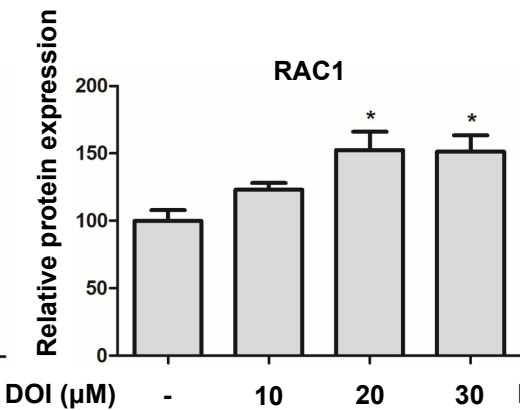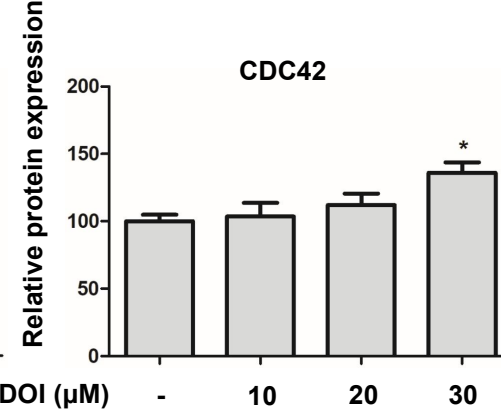

Related to Fig. 7D

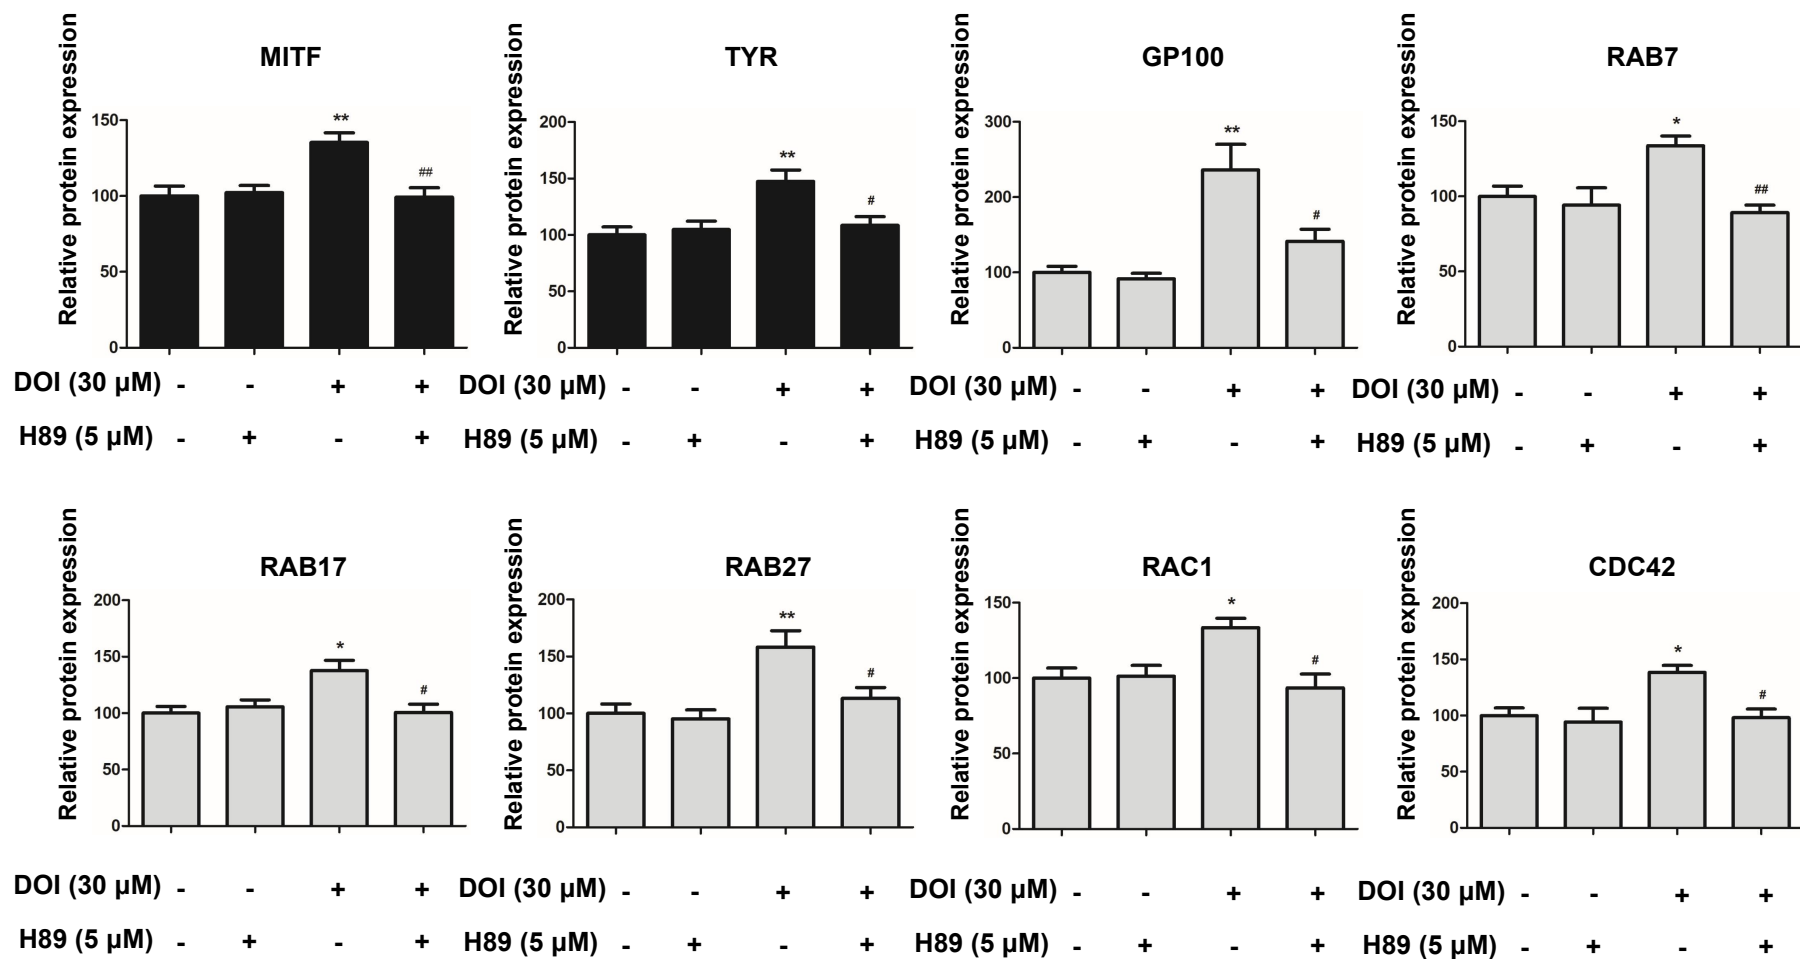

Related to Fig. S8E

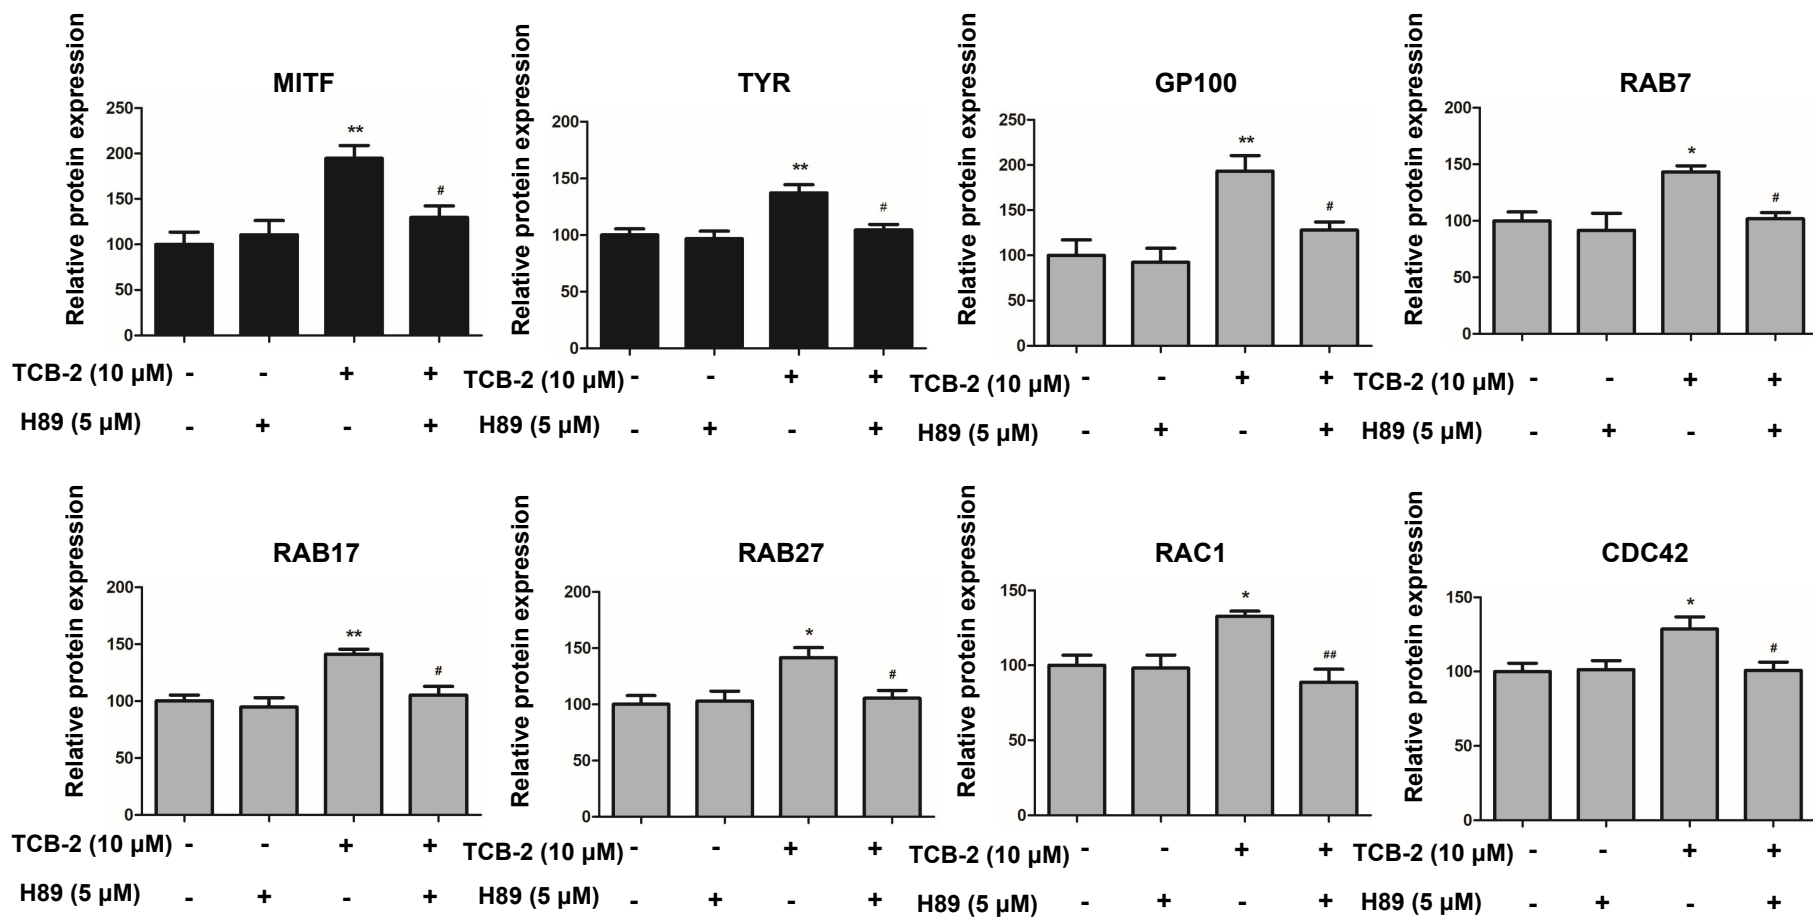

Related to Fig. S9F

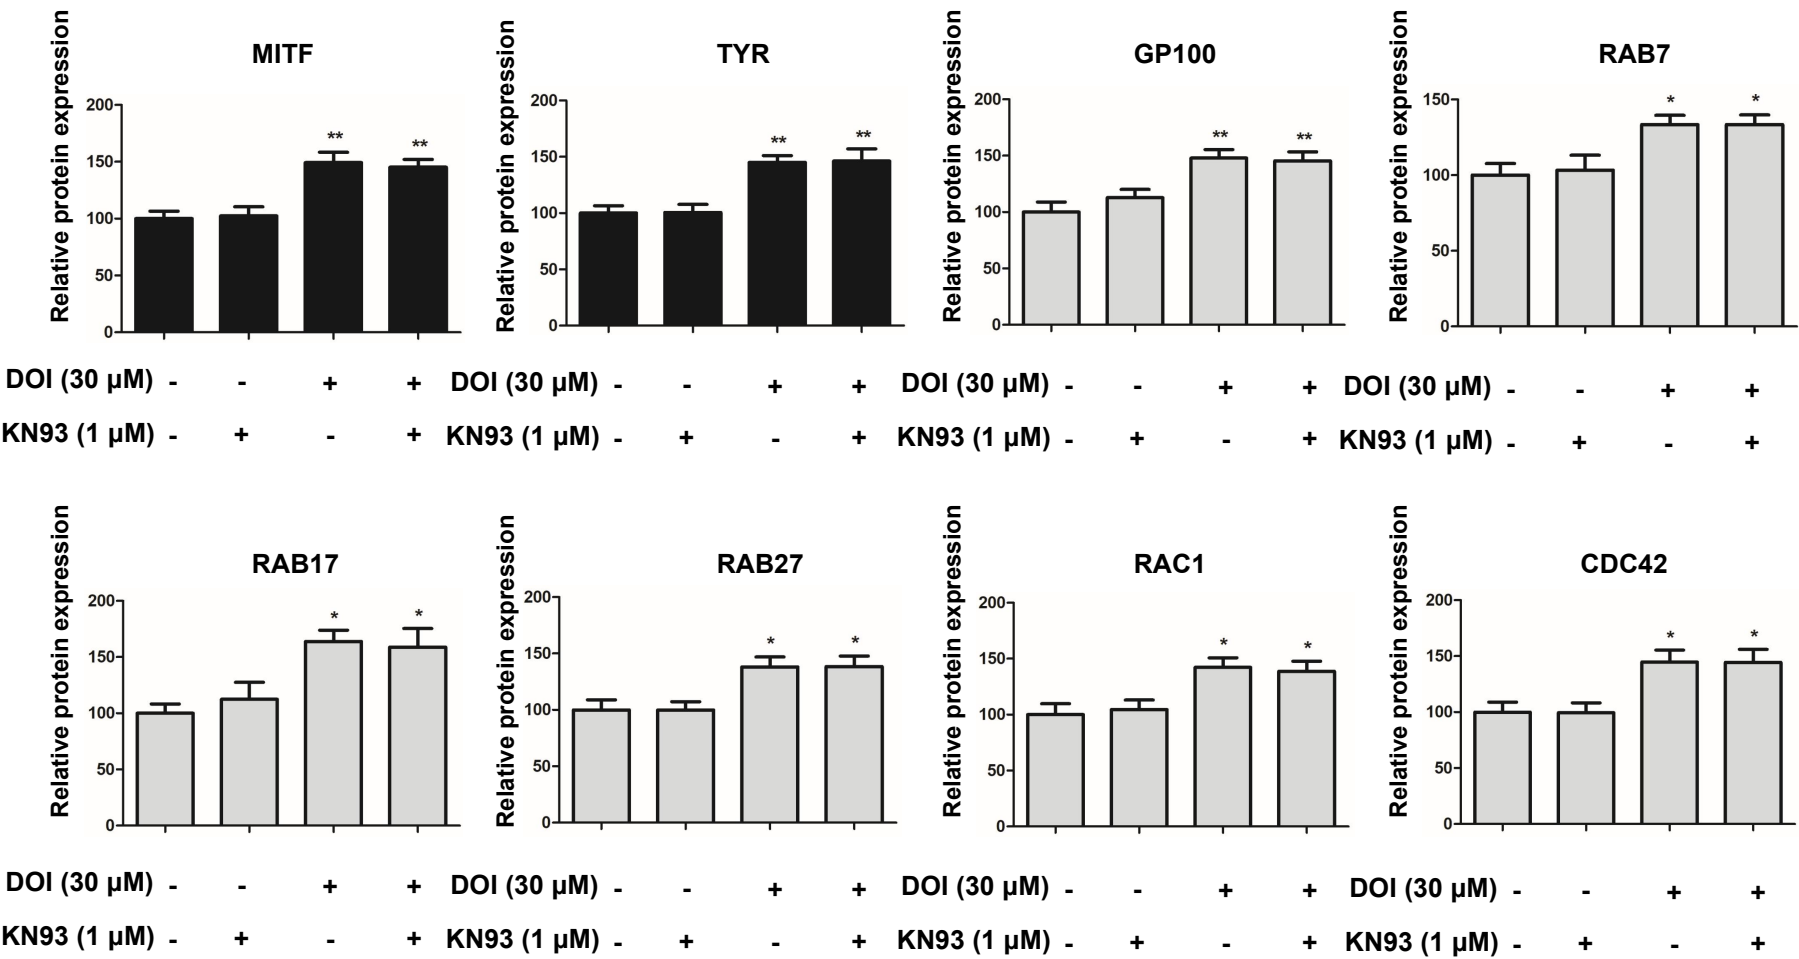

Related to Fig. S10F

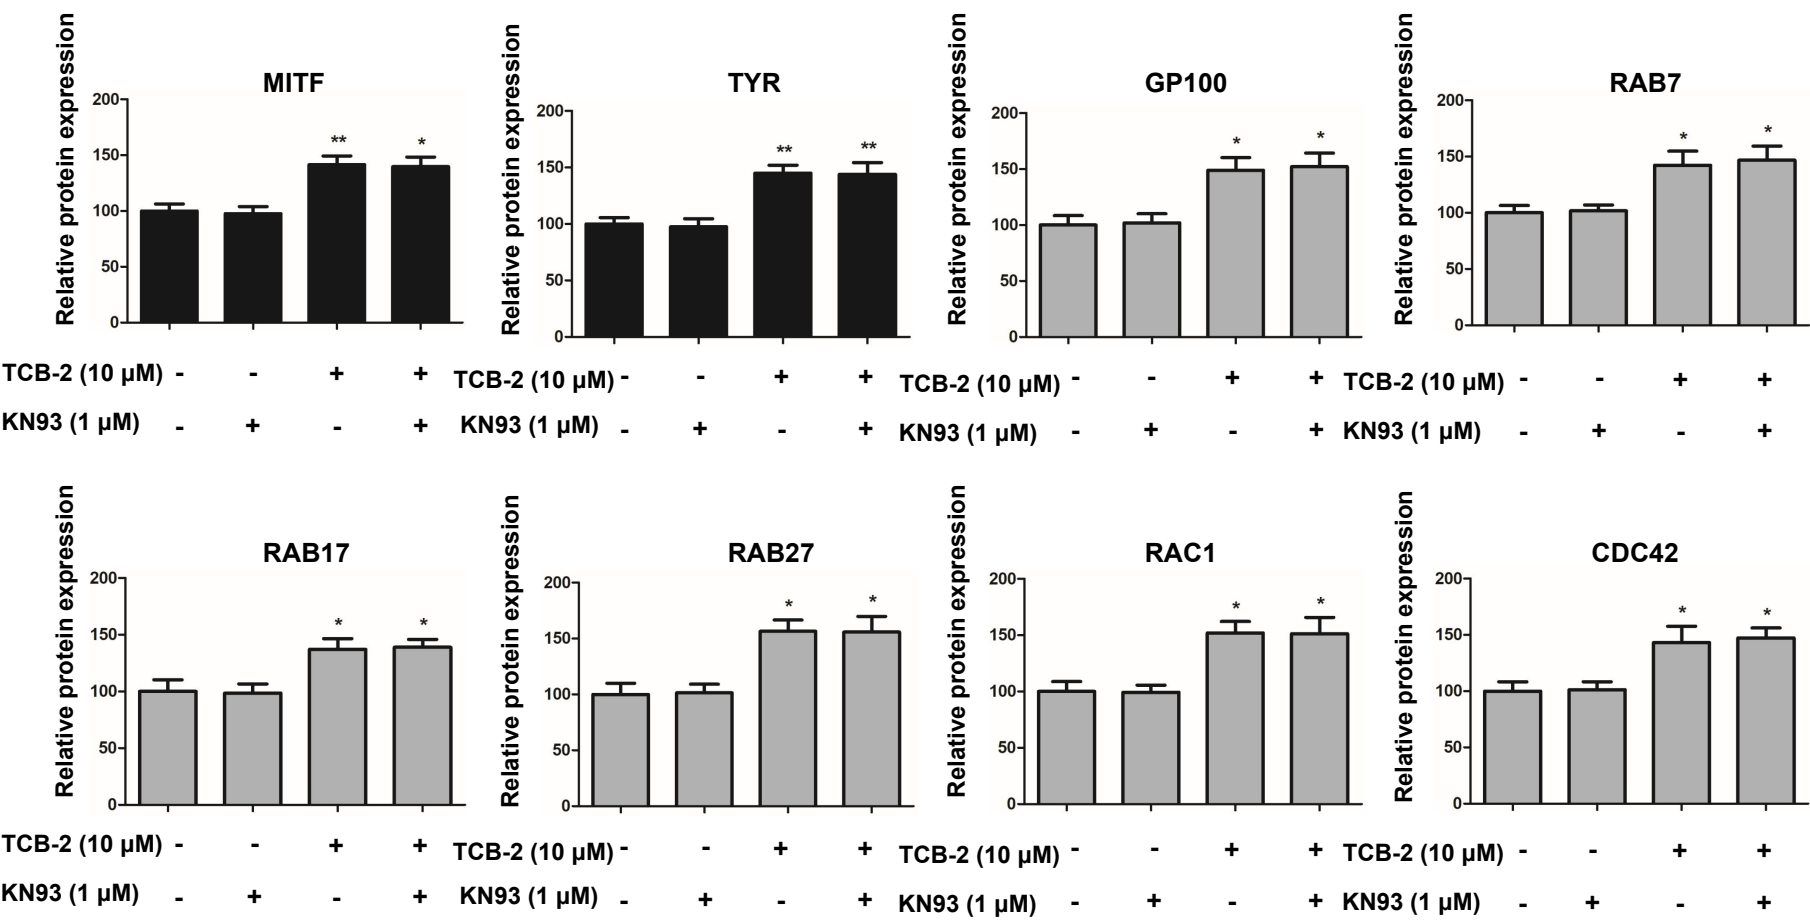

Supplement: s1 [file s1]
